# Supplementary material for: Visible-light induced C(sp3)–H arylation of glycine derivatives by cerium catalysis
Source: Royal Society of Chemistry journal article supplement (doi:10.1039/d3ob01458d), 2023-01-01

# Electronic Supplementary Information

## Visible-light induced C(sp<sup>3</sup>)-H arylation of glycine derivatives by cerium catalysis

Shutao Wang,<sup>a,‡</sup> Yanjie Ye,<sup>a,‡</sup> Hailong Shen,<sup>a</sup> Jiyu Liu,<sup>a</sup> Zhao Liu,<sup>b</sup> Zhigen Jiang,<sup>a</sup> Junqiang Lei,<sup>b</sup> and Yuan Zhang<sup>a\*</sup>

<sup>a</sup> State Key Laboratory of Applied Organic Chemistry, College of Chemistry and Chemical Engineering, Lanzhou University, 222 Tianshui South Road, Lanzhou 730000, P. R. China.

<sup>b</sup> First Hospital of Lanzhou University, Lanzhou University.

\*E-mail: zhangyuan@lzu.edu.cn.

‡ These authors contributed equally to this work

## Table of Contents

|                                                                        |    |
|------------------------------------------------------------------------|----|
| <b>1. Experiment Information</b> .....                                 | S2 |
| <b>2. Optimization of Reaction Conditions</b> .....                    | S5 |
| <b>3. References</b> .....                                             | S8 |
| <b>4. Copies of <sup>1</sup>H and <sup>13</sup>C NMR Spectra</b> ..... | S9 |

## 1. Experiment Information

### 1.1 General information

Unless otherwise noted, all reagents were purchased from commercial sources and used as received without further purification. *N*-arylglycine derivatives<sup>1,2</sup> were prepared according to literature procedures. Unless otherwise indicated, all experiments were carried out under air atmosphere. Irradiation of photochemical reactions was carried out using an 18 W blue LED bulb or 5 W LED waveband light source. The silica gel (200–300 meshes) was used for column chromatography and TLC inspections were taken on silica gel GF254 plates. Liquid <sup>1</sup>H and <sup>13</sup>C NMR spectra were recorded on a Bruker Avance III 400 MHz spectrometer. High resolution mass spectra (HRMS) were obtained on a mass spectrometer by using electrospray ionization (ESI) analyzed by quadrupole time-of-flight (QTof).

### 1.2 General procedure for the visible-light induced oxidative dehydrogenative coupling of glycine esters and electron-rich arenes.

To a solution of *N*-arylglycine derivative **1** (0.2 mmol, 1 eq) in dry CH<sub>3</sub>CN (4 mL) was added Ce(OTf)<sub>3</sub> (30 mol%). The mixed solution was irradiated with 18 W blue LEDs under air atmosphere at room temperature, until the glycine derivative reacted completely (monitored by TLC). Then **2** (0.22 mmol, 1.1 eq) was added and stirred at room temperature (without the irradiation of blue LEDs). After completion of the reaction as monitored by TLC, the solvent was removed under vacuo, and the residue was purified by silica gel column chromatography (with PE/EA = 16/1 to 10/1 as eluent) to afford the products.

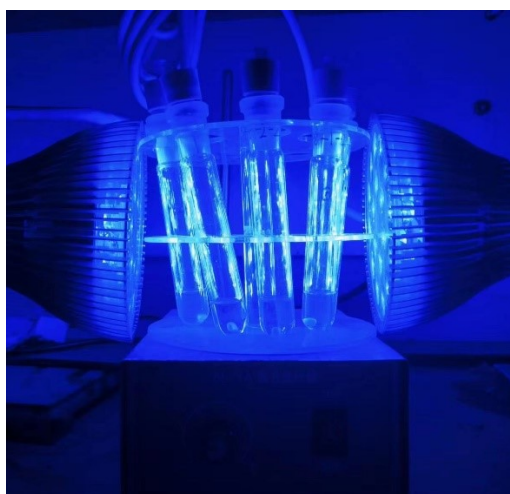

**Fig. S1** Picture of photoreaction device.

### 1.3 Gram-scale synthesis

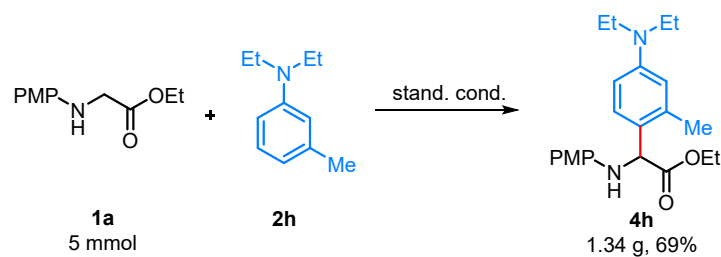

**Scheme S1** Gram scale experiment.

To a solution of **1a** (1.05 g, 5.0 mmol, 1 eq) in dry CH<sub>3</sub>CN (100 mL) was added Ce(OTf)<sub>3</sub> (0.88 g, 30 mol%). The mixed solution was irradiated with 18 W blue LEDs under air atmosphere at room temperature, until the **1a** reacted completely (monitored by TLC). Then **2h** (1.02 g, 7.5 mmol, 1.5 eq) were added and stirred at room temperature (without the irradiation of blue LEDs). After completion of the reaction as monitored by TLC, the solvent was removed under vacuo, and the residue was purified by silica gel column chromatography (with PE/EA = 16/1 as eluent) to afford the product **4h** (1.34 g, 69 % yield) as a yellow oil.

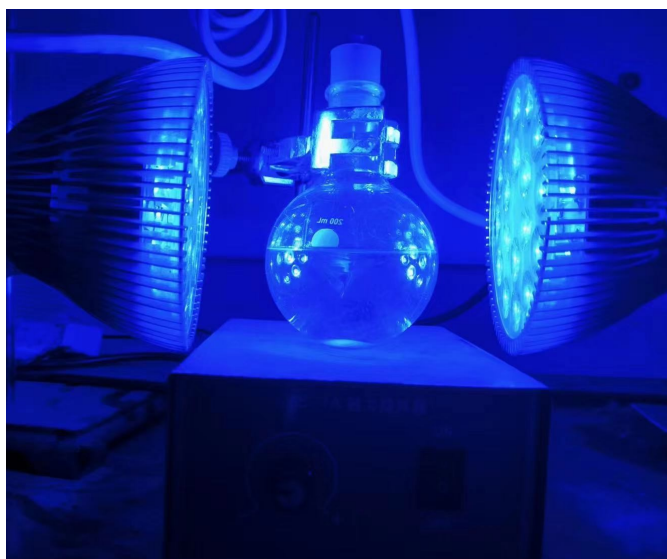

**Fig. S2** Picture of set-up for the gram scale reaction.

## 1.4 Substrate limitation

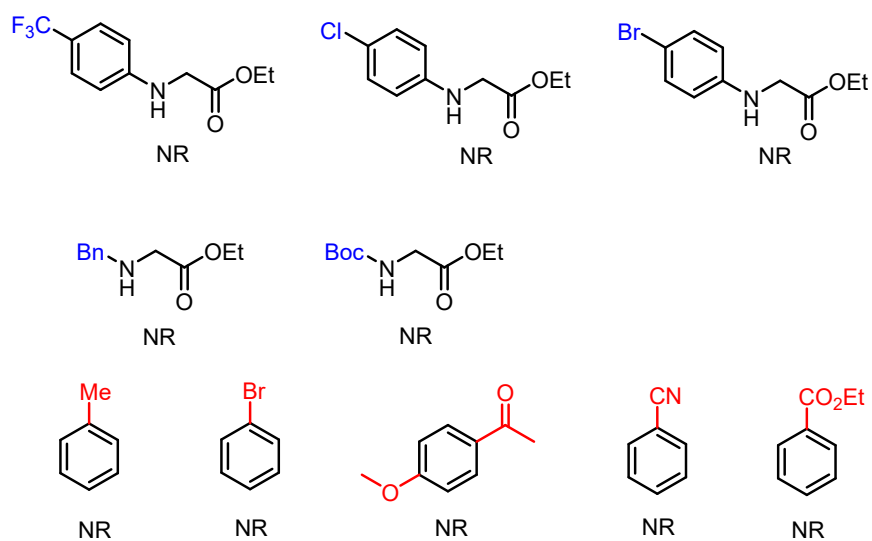

**Scheme S2** Unsuccessful glycine derivatives and arenes (NR means no reaction).

## 2. Optimization of Reaction Conditions

Table S1. Screening of light sources <sup>a</sup>

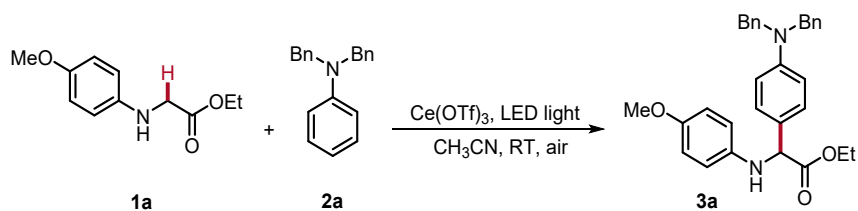

| Entry    | Light Source    | Yield (%) <sup>b</sup> |
|----------|-----------------|------------------------|
| 1        | 365-375 nm      | 67                     |
| 2        | 380-385 nm      | 85                     |
| 3        | 390-400 nm      | 82                     |
| <b>4</b> | <b>Blue LED</b> | <b>95</b>              |
| 5        | White LED       | 82                     |
| 6        | Green LED       | 65                     |
| 7        | dark            | trace                  |

<sup>a</sup>Reaction conditions: **1a** (0.1 mmol), **2a** (0.11 mmol),  $\text{Ce}(\text{OTf})_3$  (30 mol%),  $\text{CH}_3\text{CN}$  (2.0 mL), LED light irradiation under air at room temperature. <sup>b</sup>Yields were determined by  $^1\text{H}$  NMR analysis using 1,3,5-trimethoxybenzene as an internal standard.

**Table S2.** Screening of catalysts <sup>a</sup>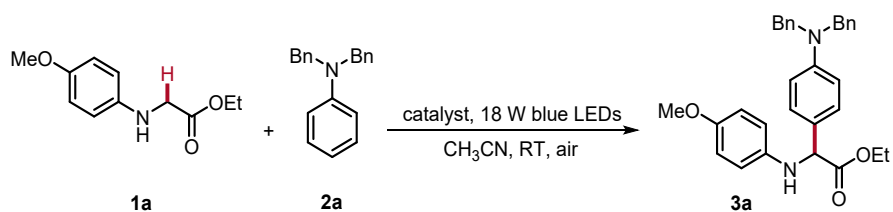

| Entry          | Catalyst                             | Yield (%) <sup>b</sup> |
|----------------|--------------------------------------|------------------------|
| 1              | CuSO <sub>4</sub> ·5H <sub>2</sub> O | NR                     |
| 2              | FeSO <sub>4</sub> ·7H <sub>2</sub> O | NR                     |
| 3              | CuI                                  | NR                     |
| 4              | AgOTf                                | NR                     |
| 5              | CeCl <sub>3</sub>                    | 65                     |
| 6              | —                                    | NR                     |
| 7 <sup>c</sup> | Ce(OTf) <sub>3</sub>                 | 71                     |
| 8 <sup>d</sup> | Ce(OTf) <sub>3</sub>                 | 68                     |

<sup>a</sup> Reaction conditions: **1a** (0.1 mmol), **2a** (0.11 mmol), catalyst (30 mol%), CH<sub>3</sub>CN (2 mL), blue LED light irradiation under air at room temperature. <sup>b</sup> Yields were determined by <sup>1</sup>H NMR analysis using 1,3,5-trimethoxybenzene as an internal standard. <sup>c</sup> 15 mol% Ce(OTf)<sub>3</sub> was used. <sup>d</sup> 40 mol% Ce(OTf)<sub>3</sub> was used.

**Table S3.** Screening of solvents <sup>a</sup>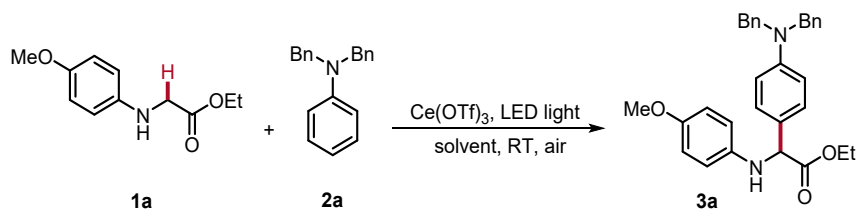

| Entry           | Solvent            | Yield (%) <sup>b</sup> |
|-----------------|--------------------|------------------------|
| 1               | CH <sub>3</sub> OH | trace                  |
| 2               | THF                | trace                  |
| 3               | DMF                | trace                  |
| 4               | DMSO               | trace                  |
| 5               | CHCl <sub>3</sub>  | 66                     |
| 6               | DCM                | 58                     |
| 7               | DCE                | 67                     |
| 8               | 1,4-Dioxane        | trace                  |
| 9               | Toluene            | trace                  |
| 10              | Et <sub>2</sub> O  | trace                  |
| 11              | EtOAc              | trace                  |
| 12 <sup>c</sup> | CH <sub>3</sub> CN | 75                     |
| 13 <sup>d</sup> | CH <sub>3</sub> CN | 86                     |

<sup>a</sup> Reaction conditions: **1a** (0.1 mmol), **2a** (0.11 mmol), Ce(OTf)<sub>3</sub> (30 mol%), solvent (2.0 mL), blue LED light irradiation under air at room temperature. <sup>b</sup> Yields were determined by <sup>1</sup>H NMR analysis using 1,3,5-trimethoxybenzene as an internal standard. <sup>c</sup> 1.0 mL CH<sub>3</sub>CN was used. <sup>d</sup> 0.5 mL CH<sub>3</sub>CN was used.

### 3. References

1. J. Xie and Z.-Z. Huang, *Angew. Chem., Int. Ed.*, 2010, **49**, 10181-10185.
2. R. Martín-Rapún, S. Sayalero and M. A. Pericàs, *Green Chem.*, 2013, **15**, 3295-3301.



## 4. Copies of $^1\text{H}$ and $^{13}\text{C}$ NMR Spectra

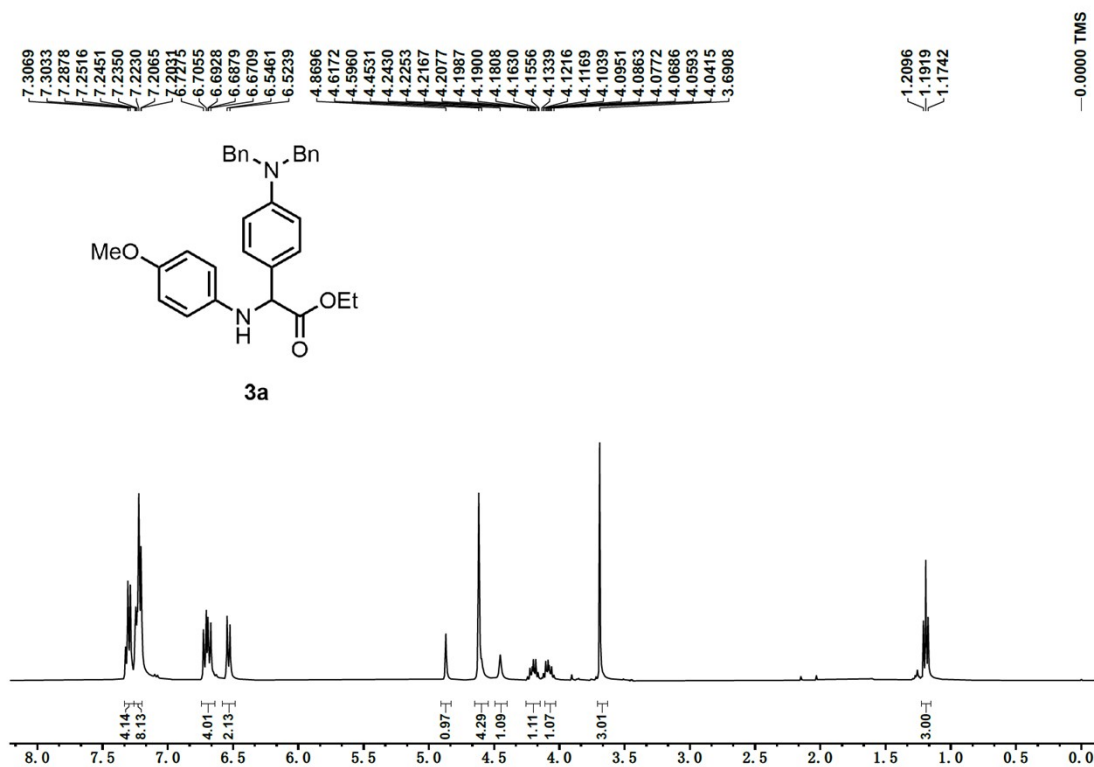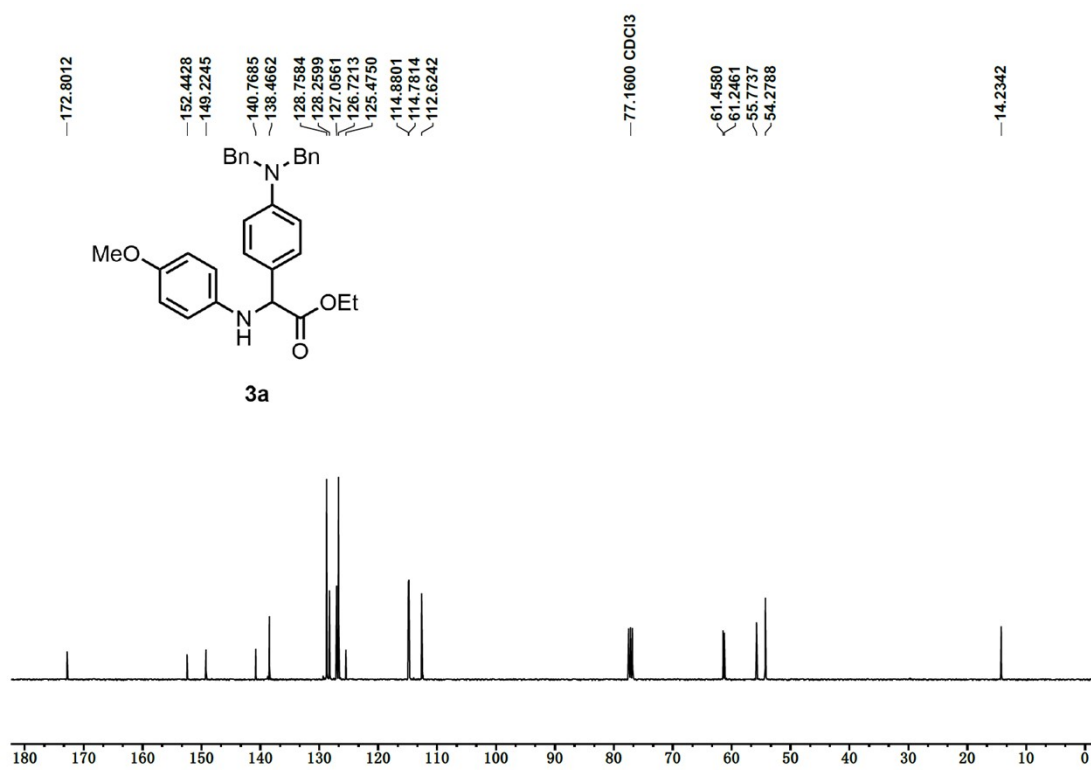

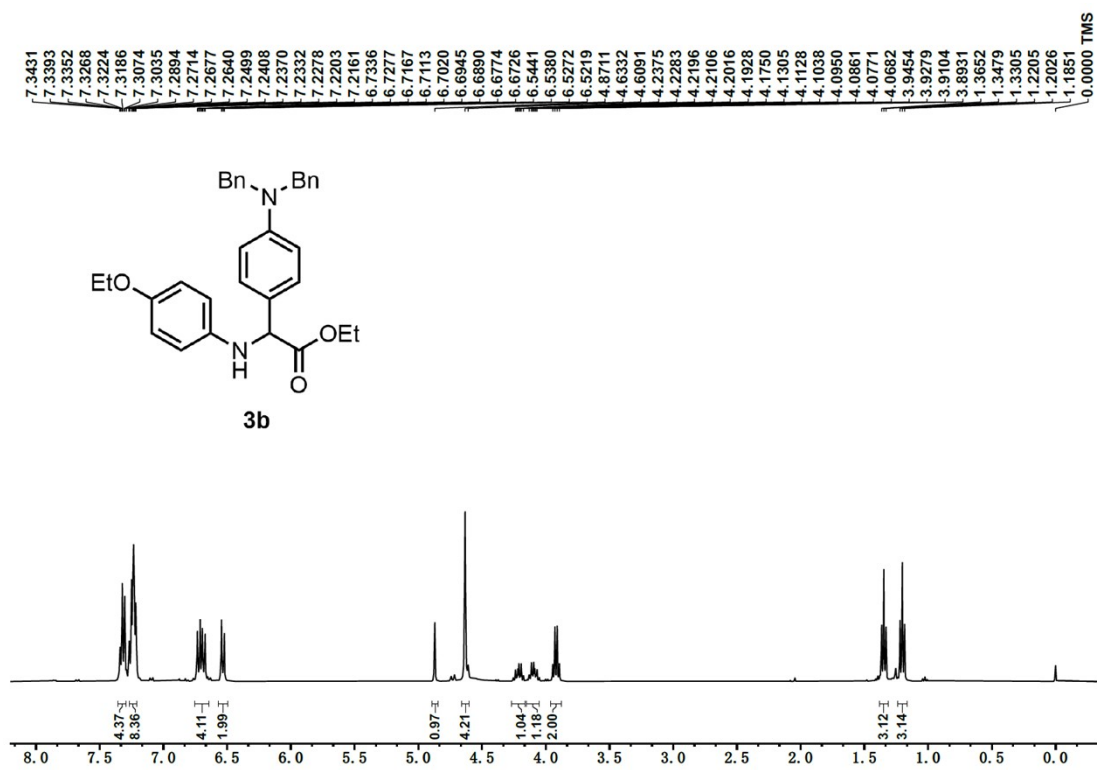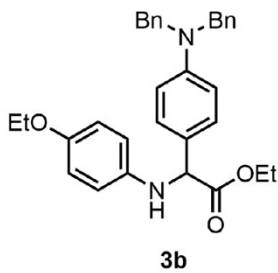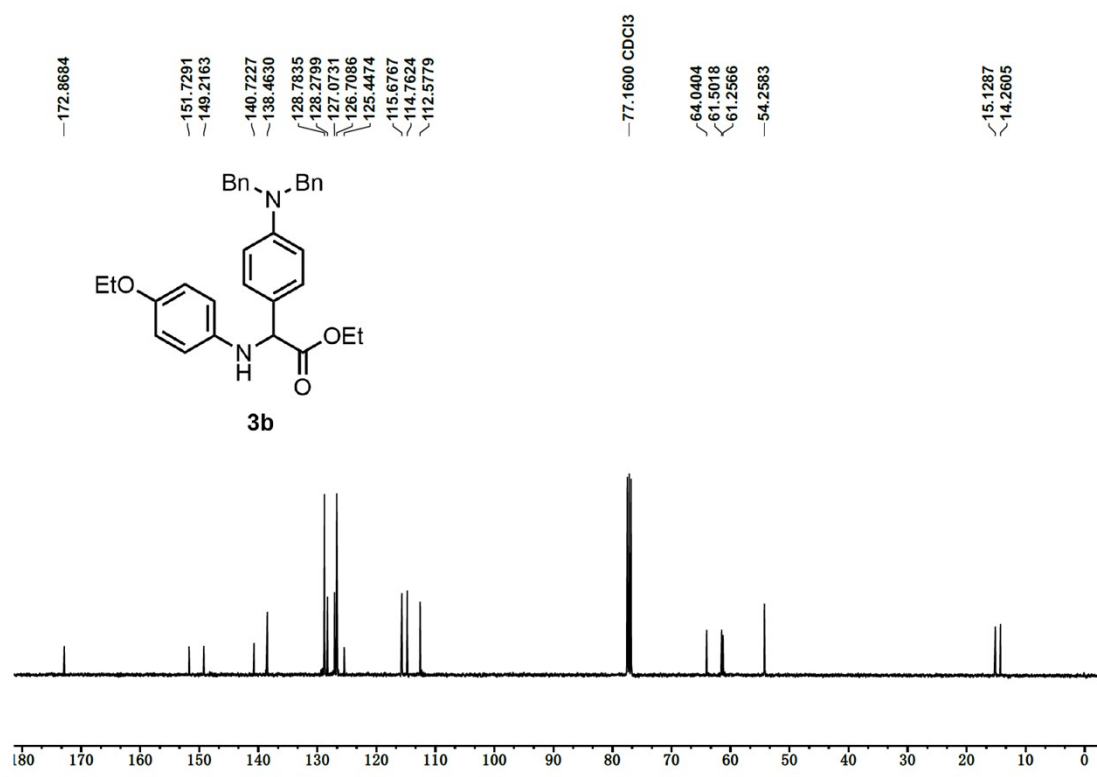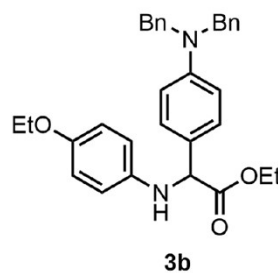

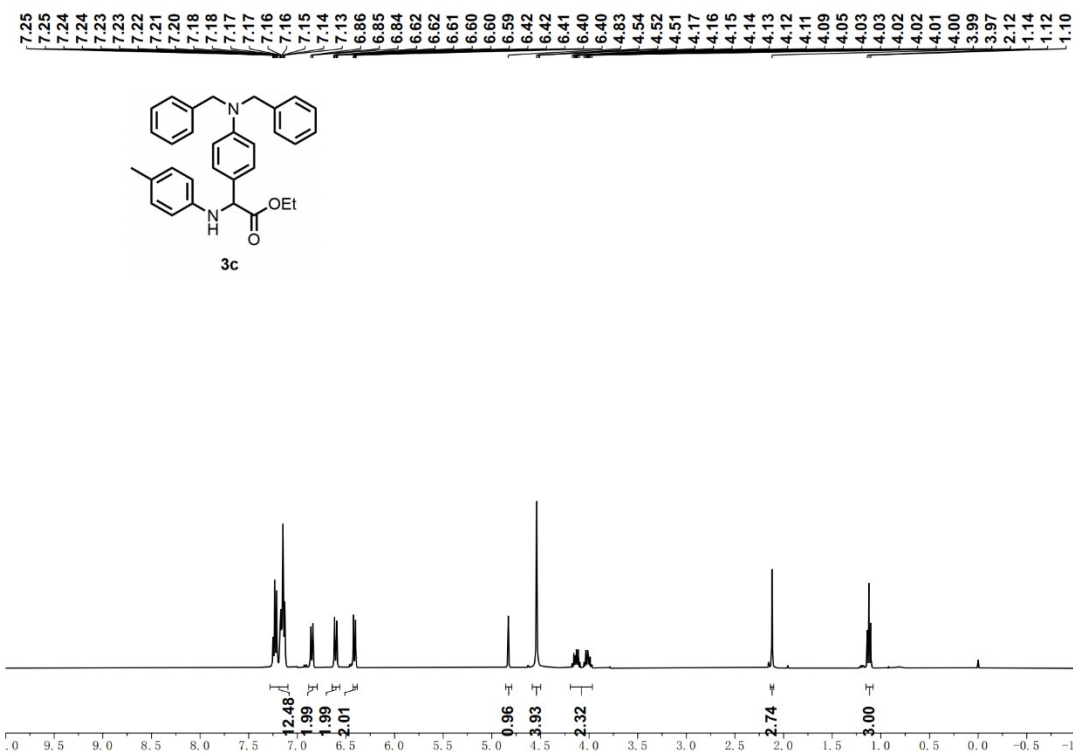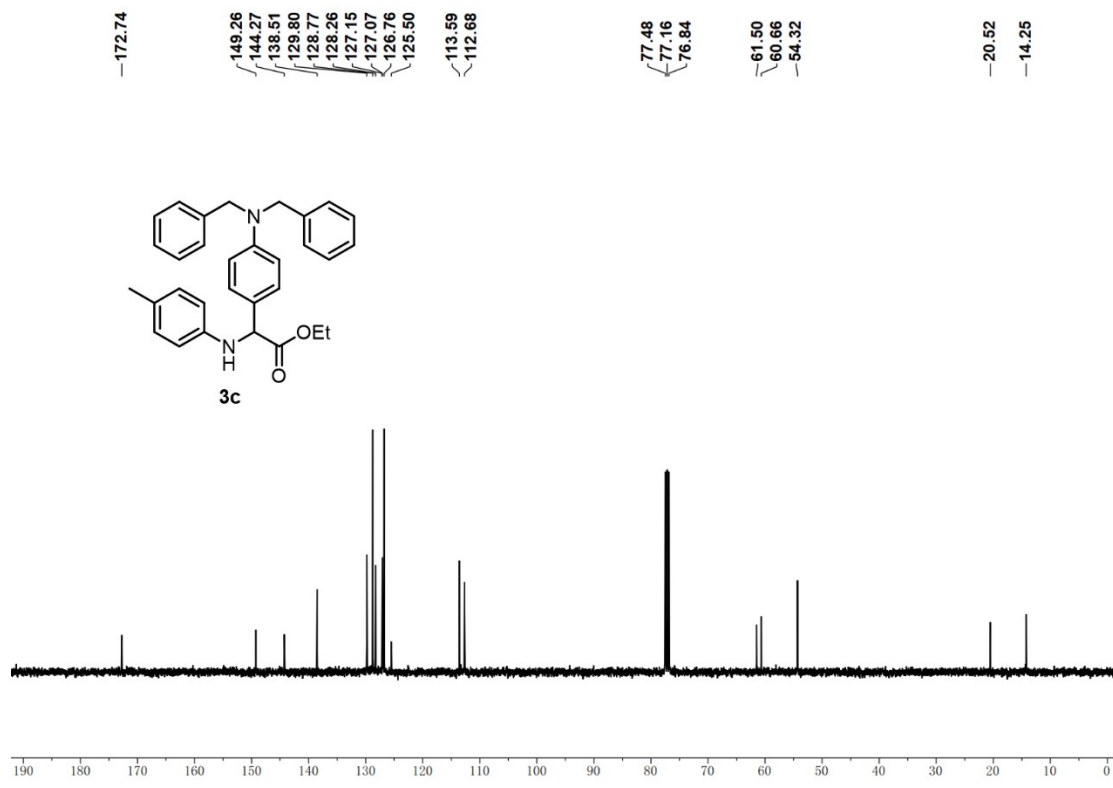

7.3416  
7.3244  
7.3207  
7.3055  
7.2899  
7.2659  
7.2566  
7.2517  
7.2457  
7.2393  
7.2349  
7.2180  
6.9769  
6.9561  
6.6941  
6.6890  
6.6771  
6.6721  
6.5264  
6.5212  
6.5102  
6.5054  
4.9057  
4.8330  
4.6106  
4.2673  
4.2495  
4.2404  
4.2320  
4.2224  
4.2138  
4.2047  
4.1870  
4.1352  
4.1174  
4.1084  
4.0996  
4.0905  
4.0818  
4.0726  
4.0549  
2.5355  
2.5165  
2.4975  
2.4786  
1.2288  
1.2110  
1.1932  
1.1756  
1.1566  
1.1377  
-0.0000 TMS

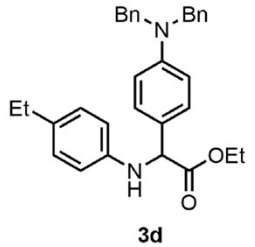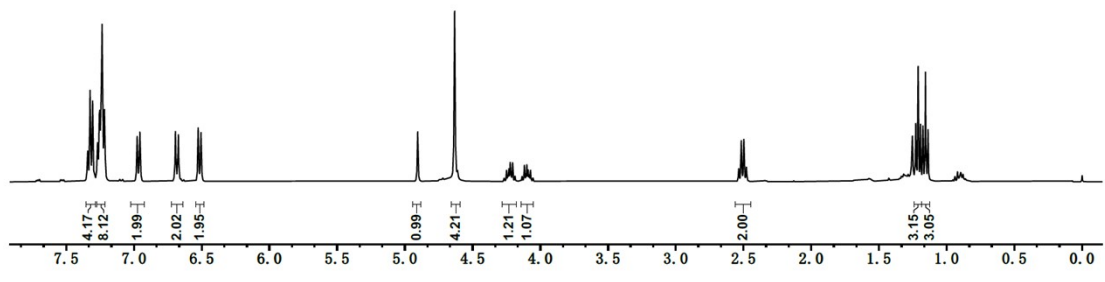

172.7802  
149.2277  
144.4559  
138.4844  
133.7448  
128.7896  
128.6241  
128.2825  
127.0771  
126.7224  
125.4793  
113.4729  
112.5884  
77.1600 CDCl3  
61.5481  
60.6195  
54.2663  
28.0266  
16.0122  
14.2617

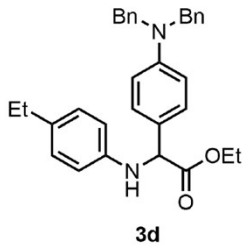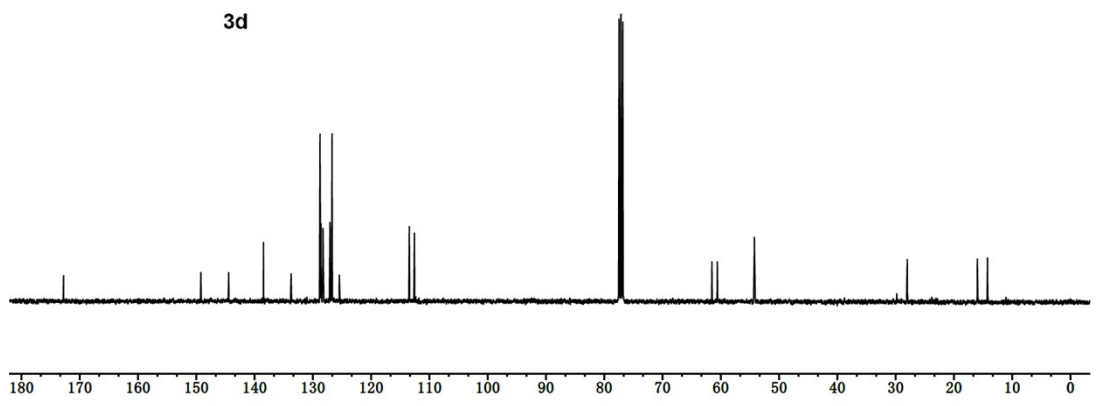

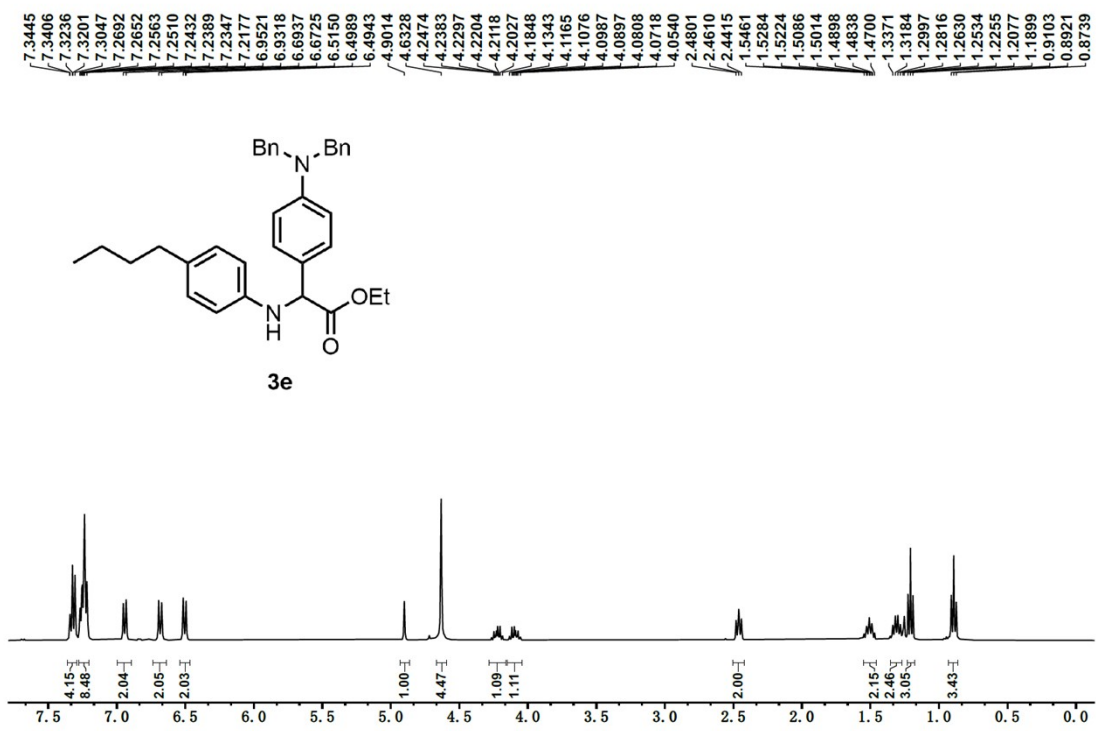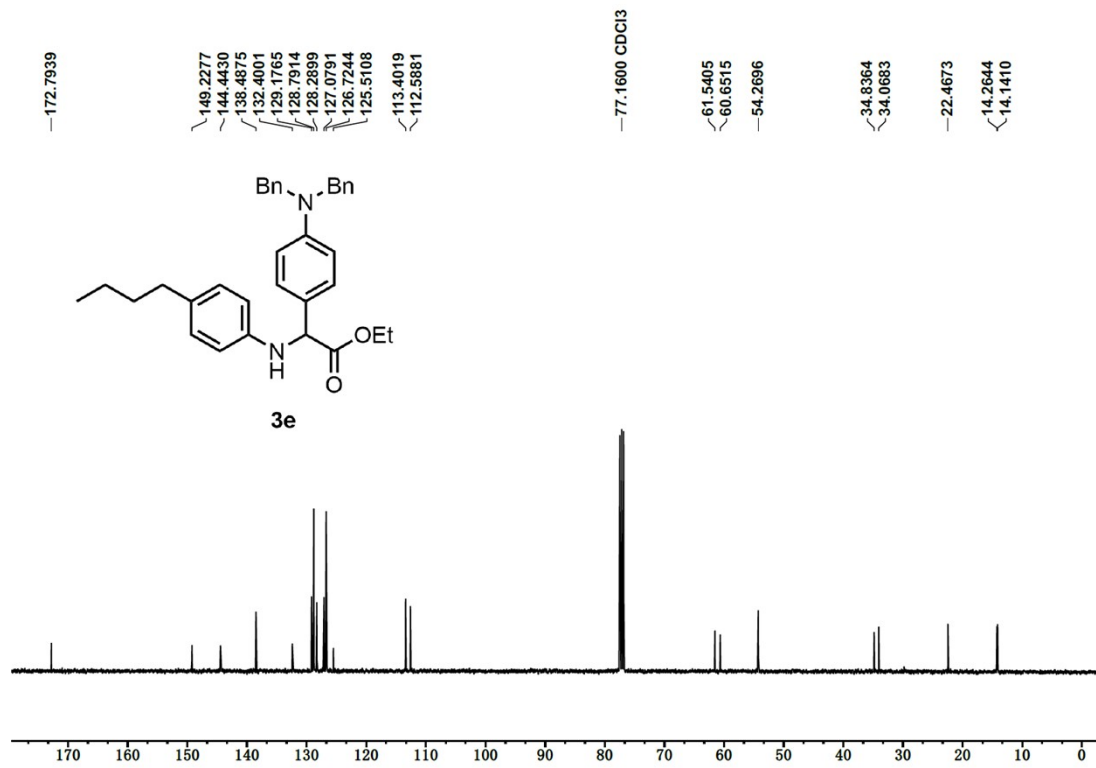

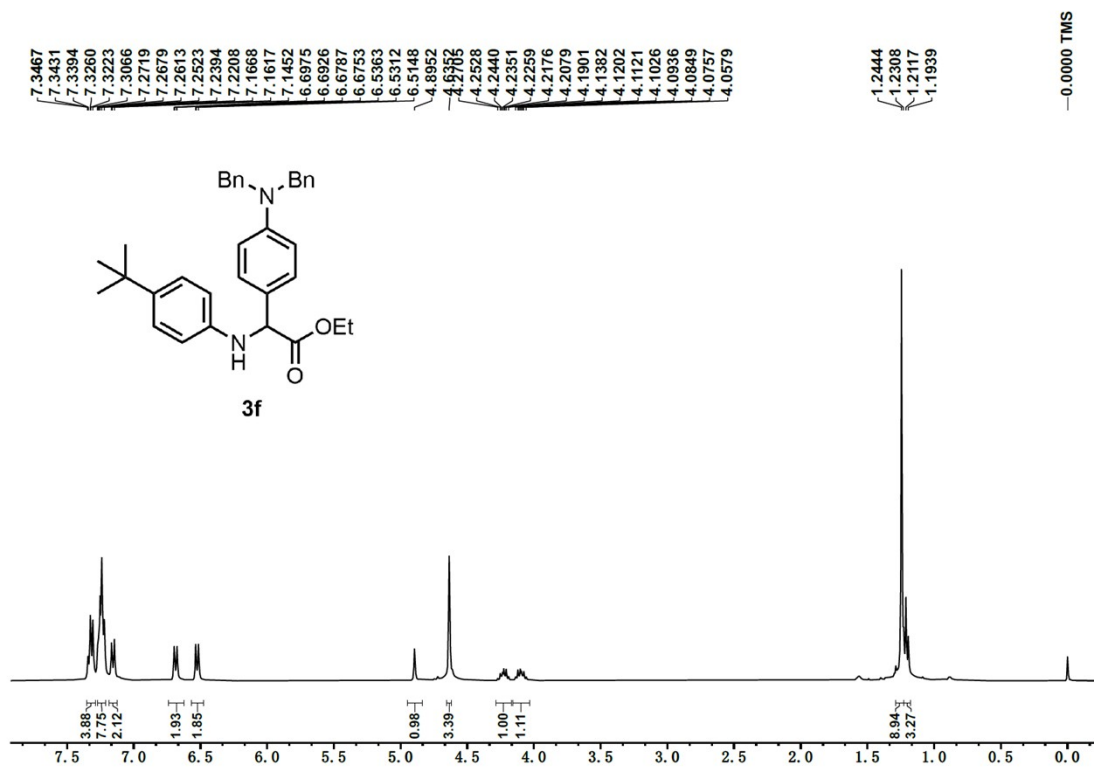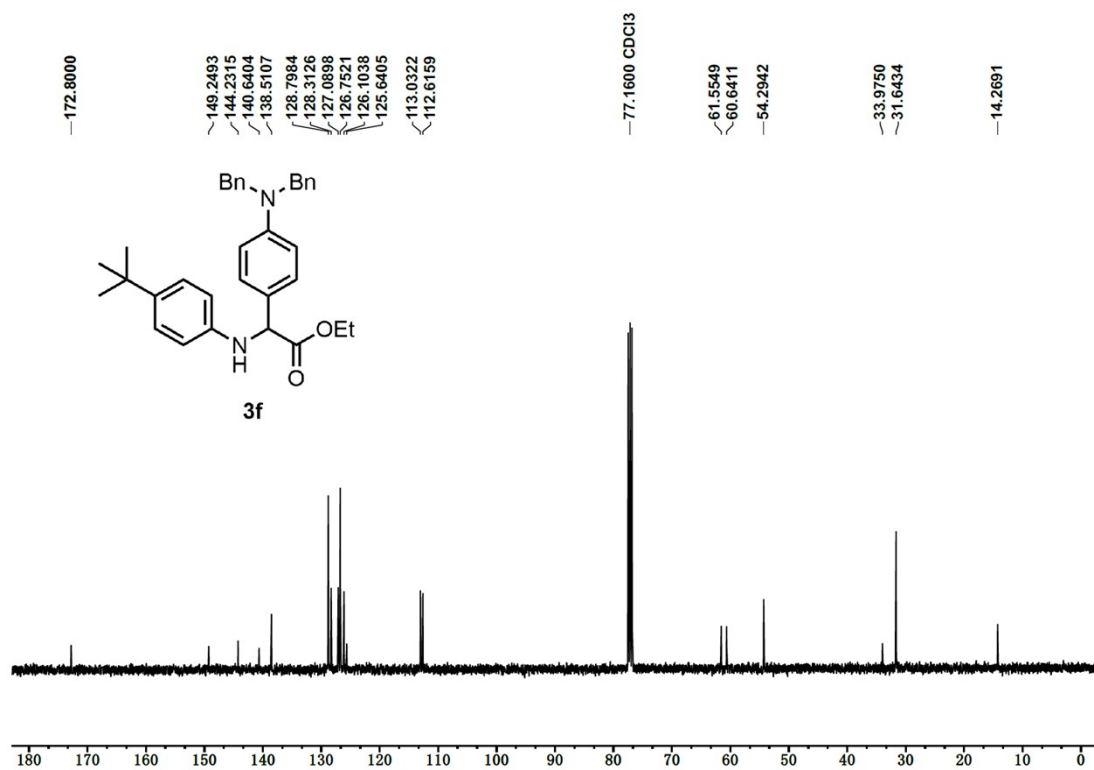

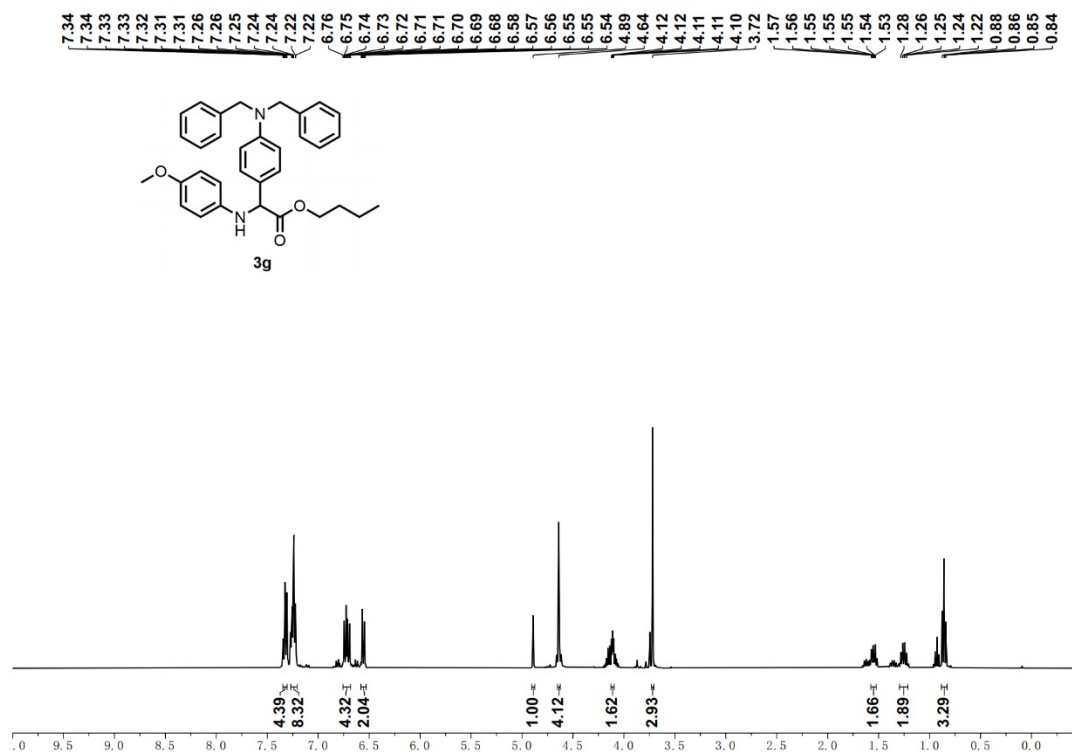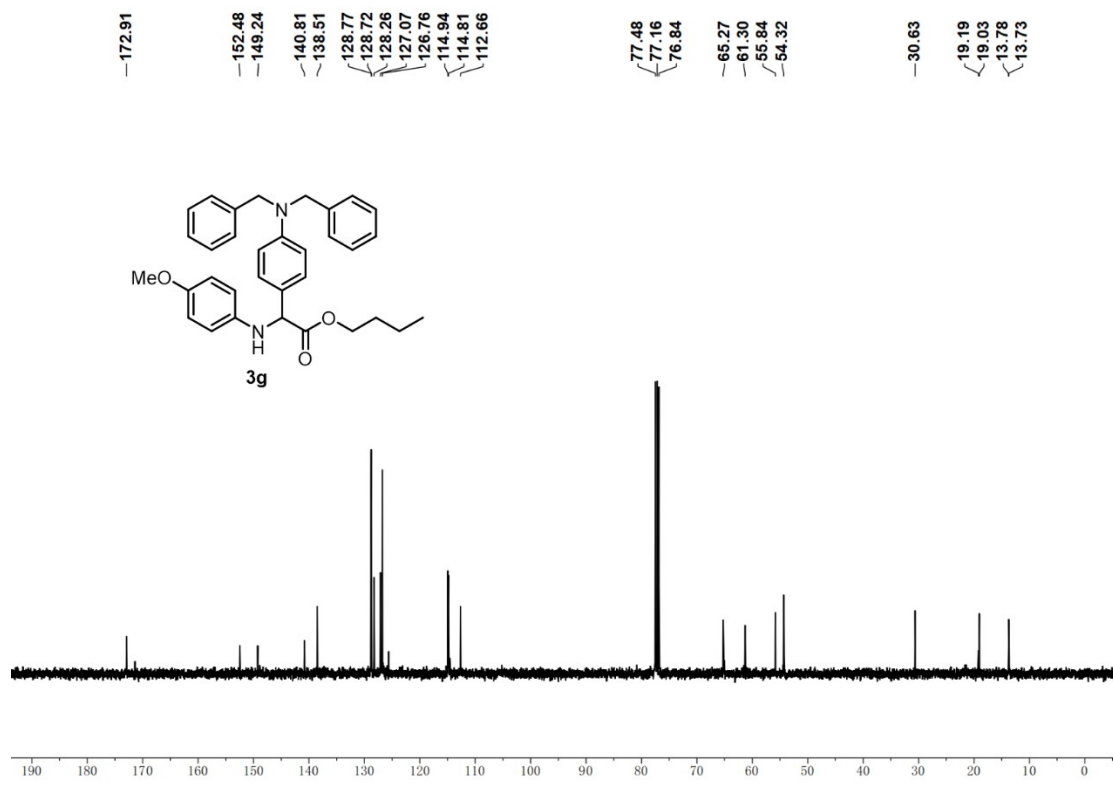

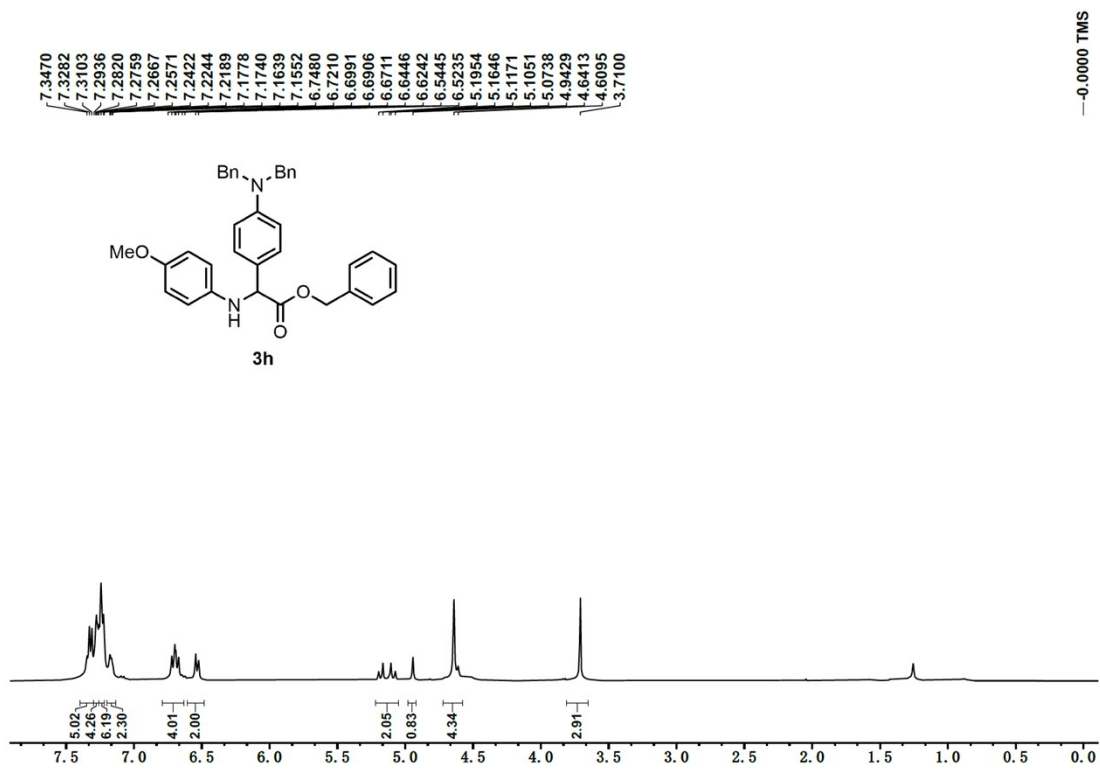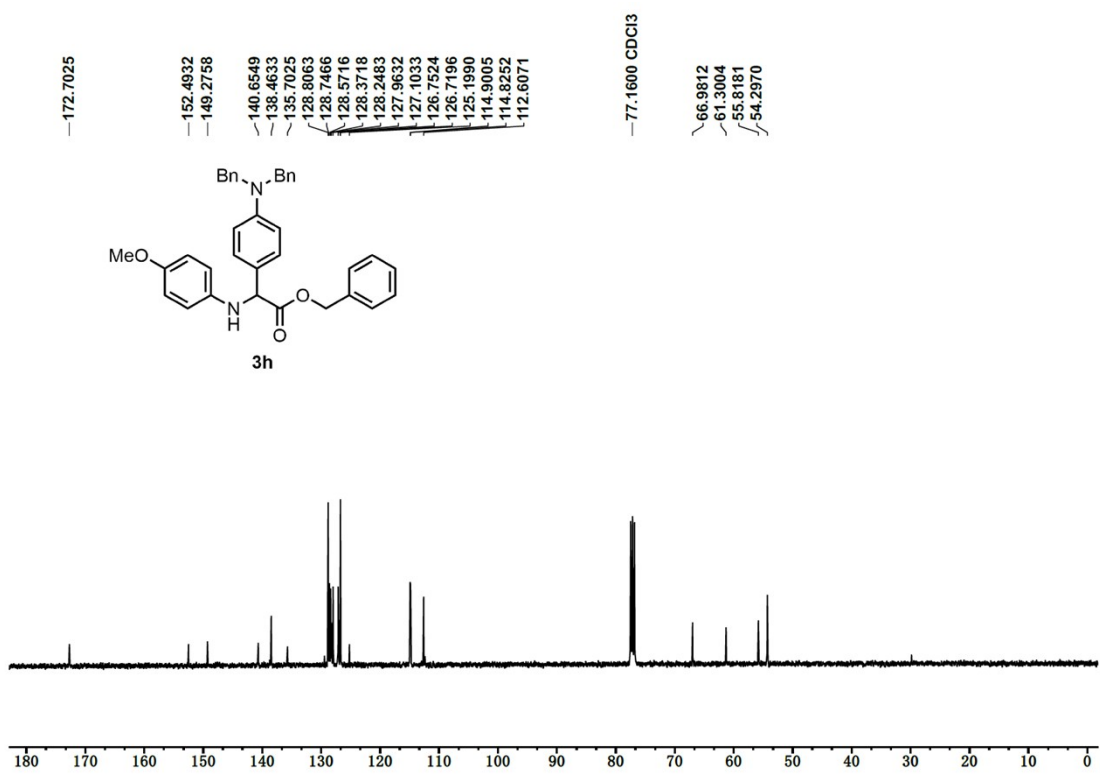



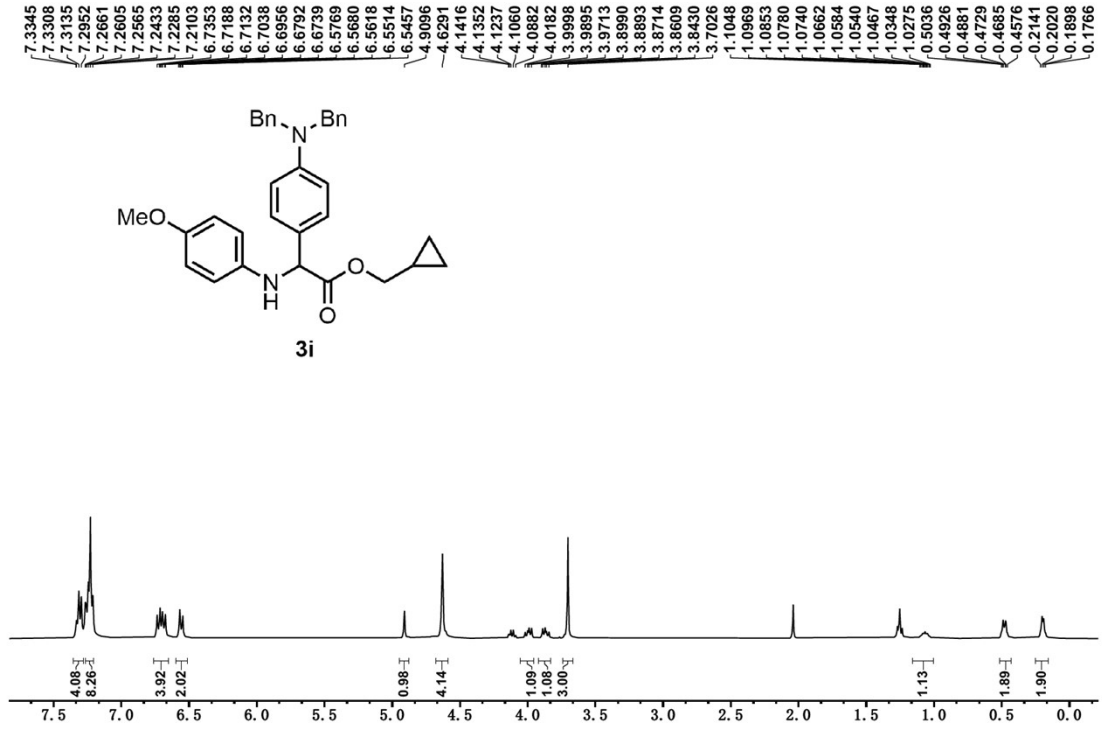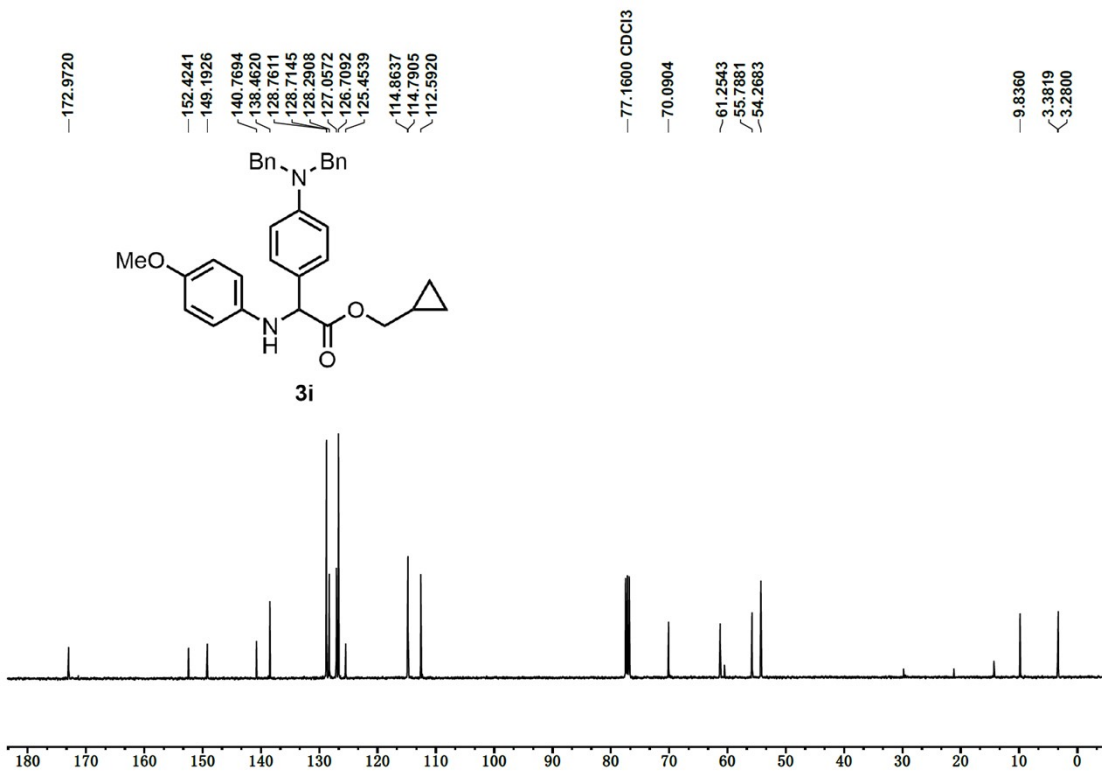

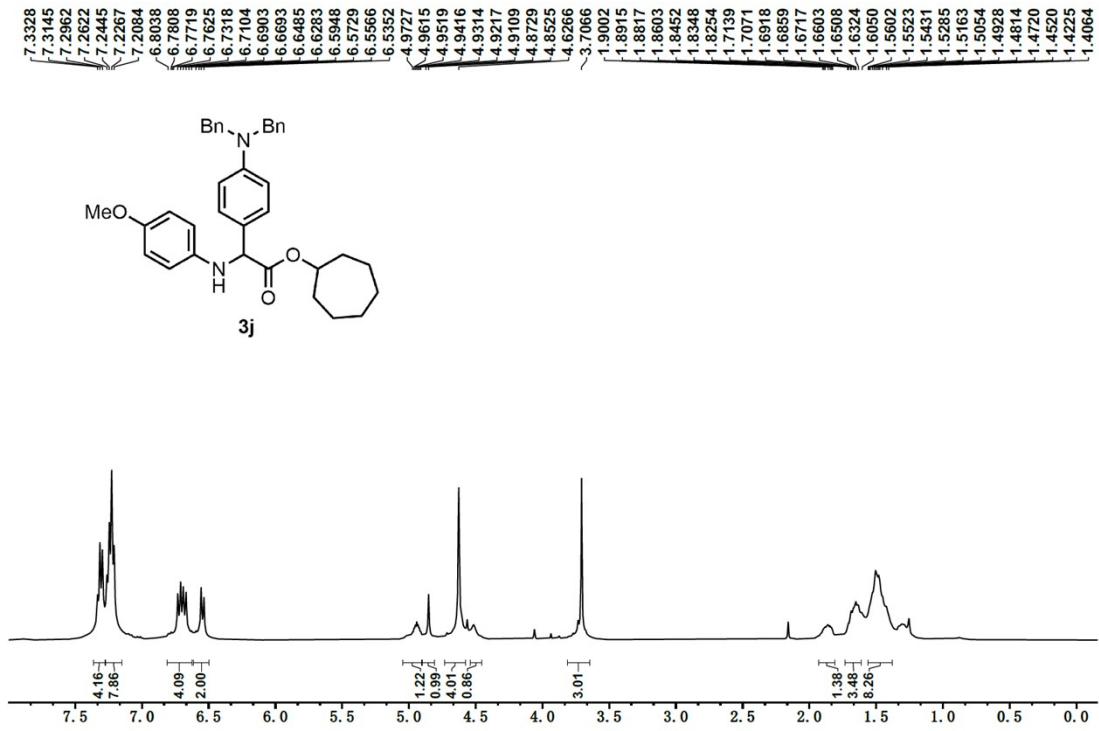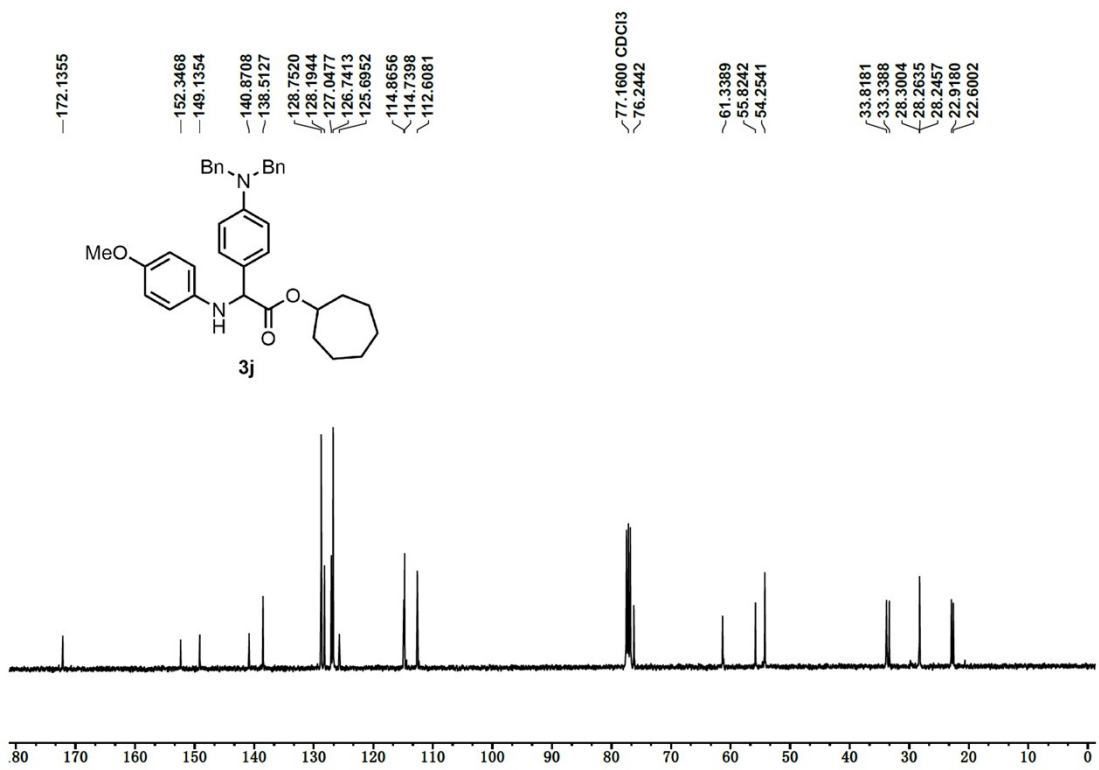

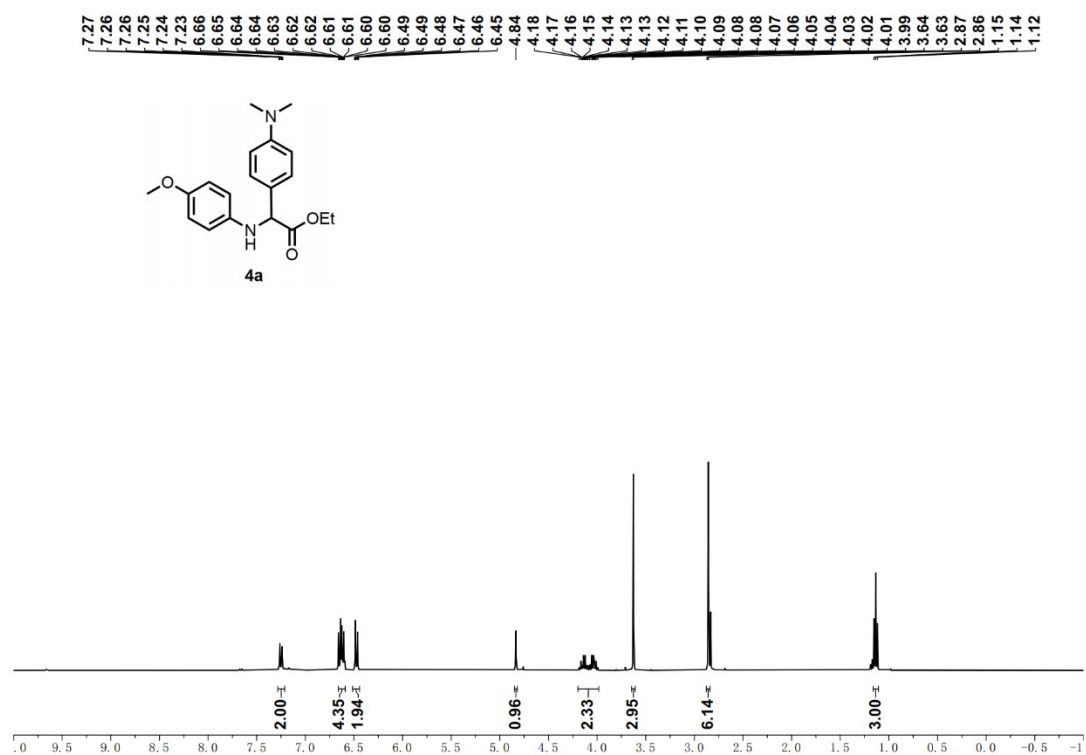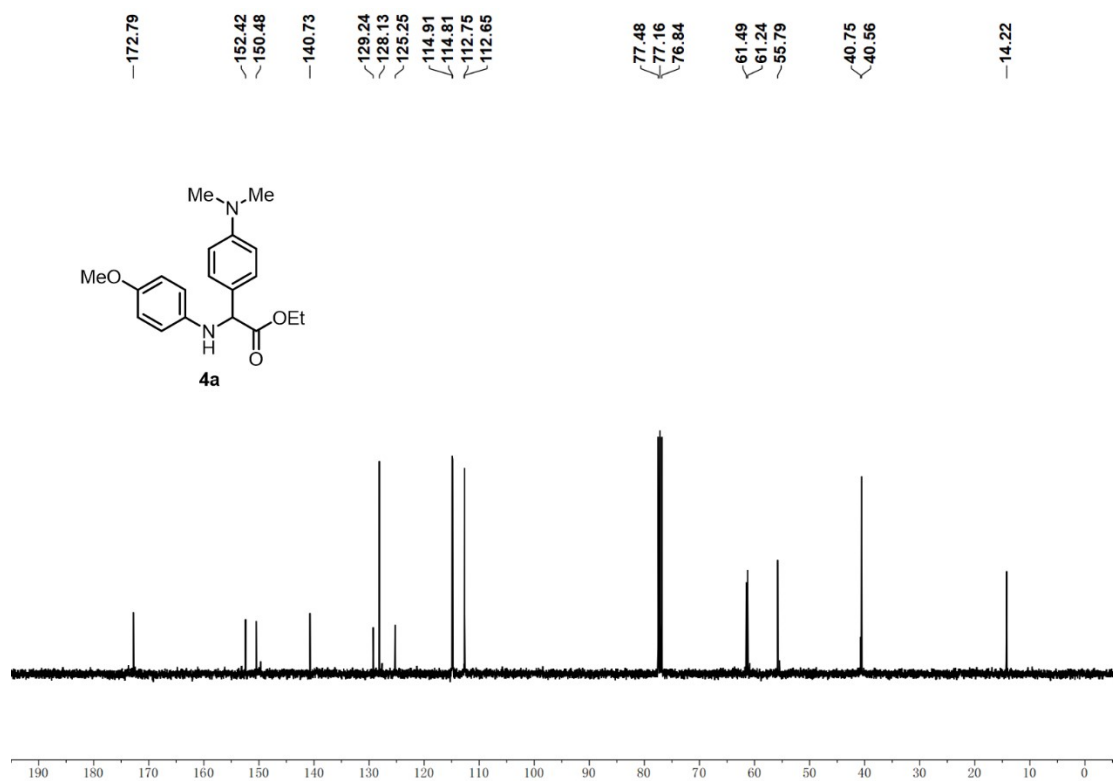

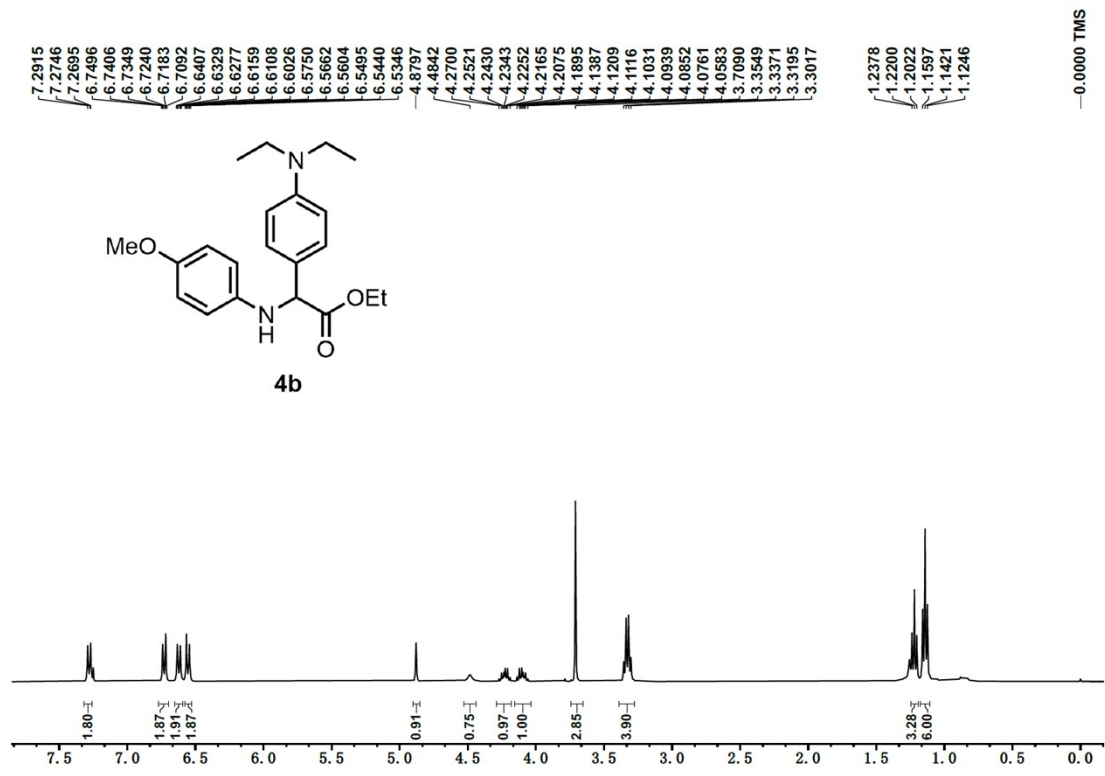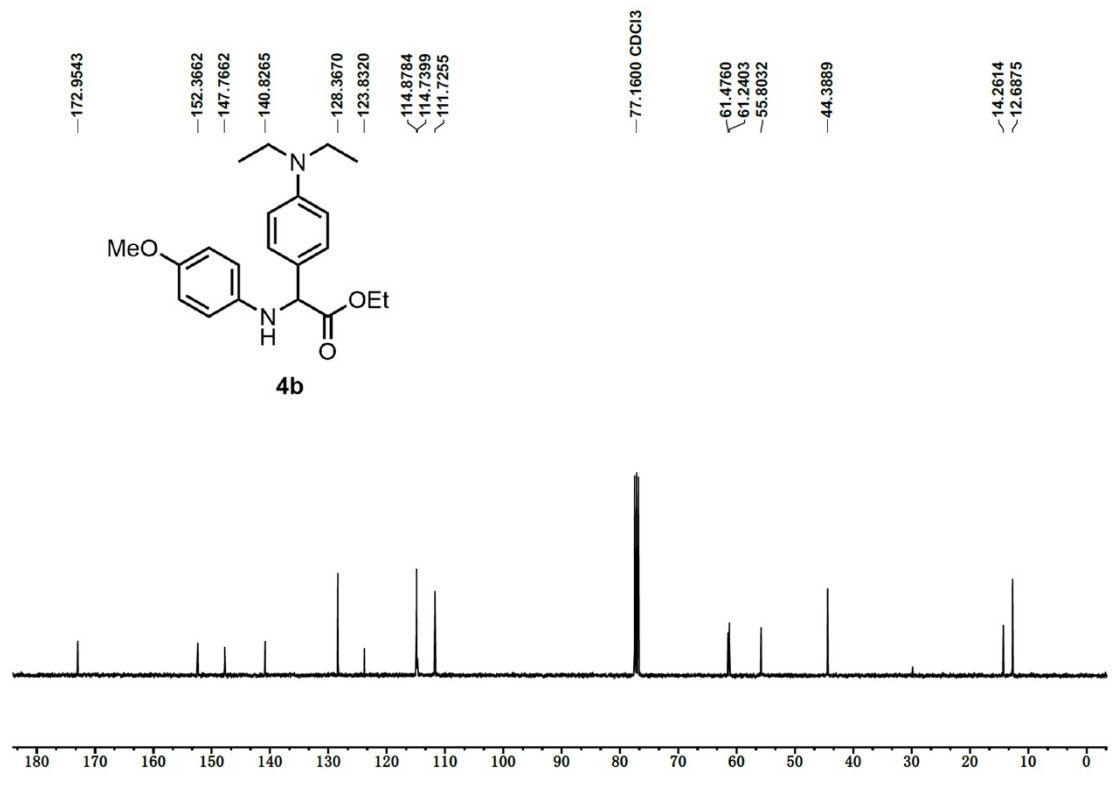

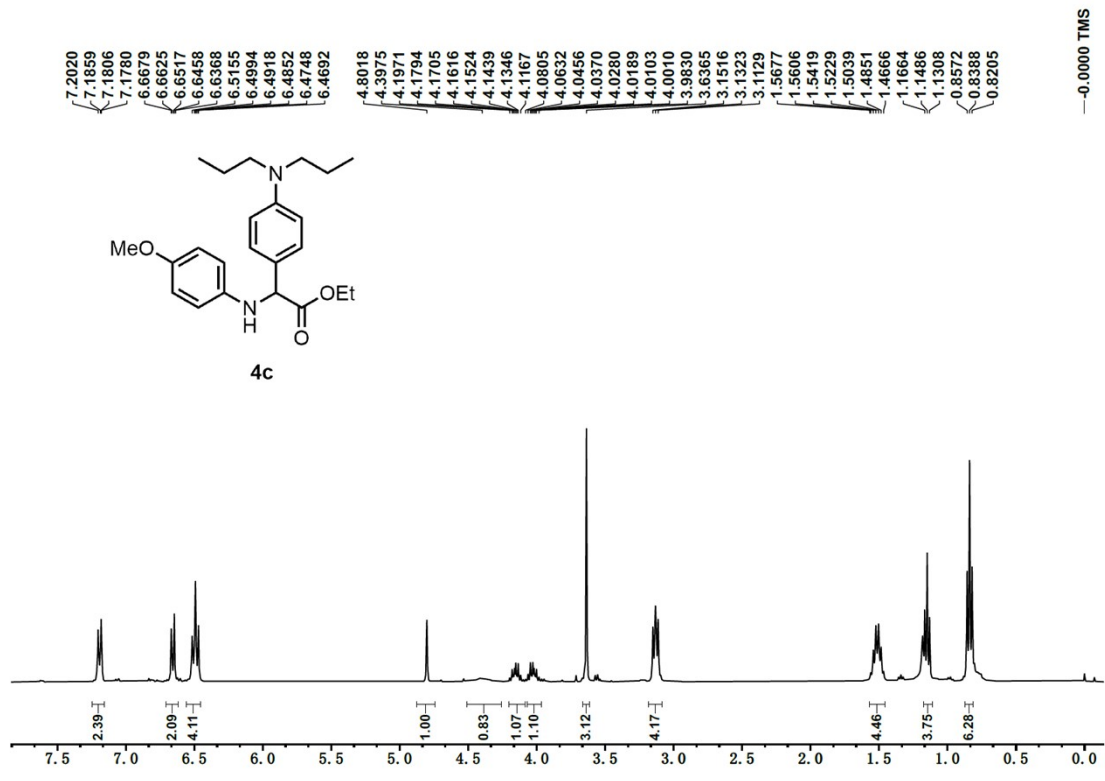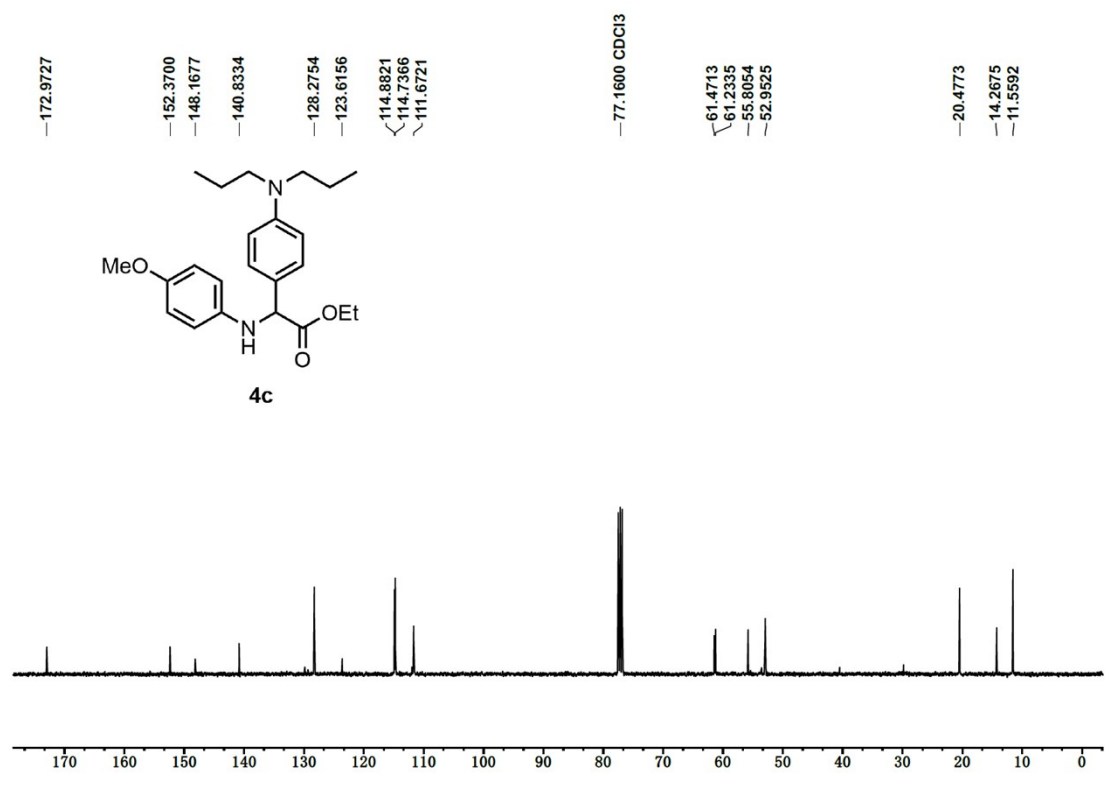

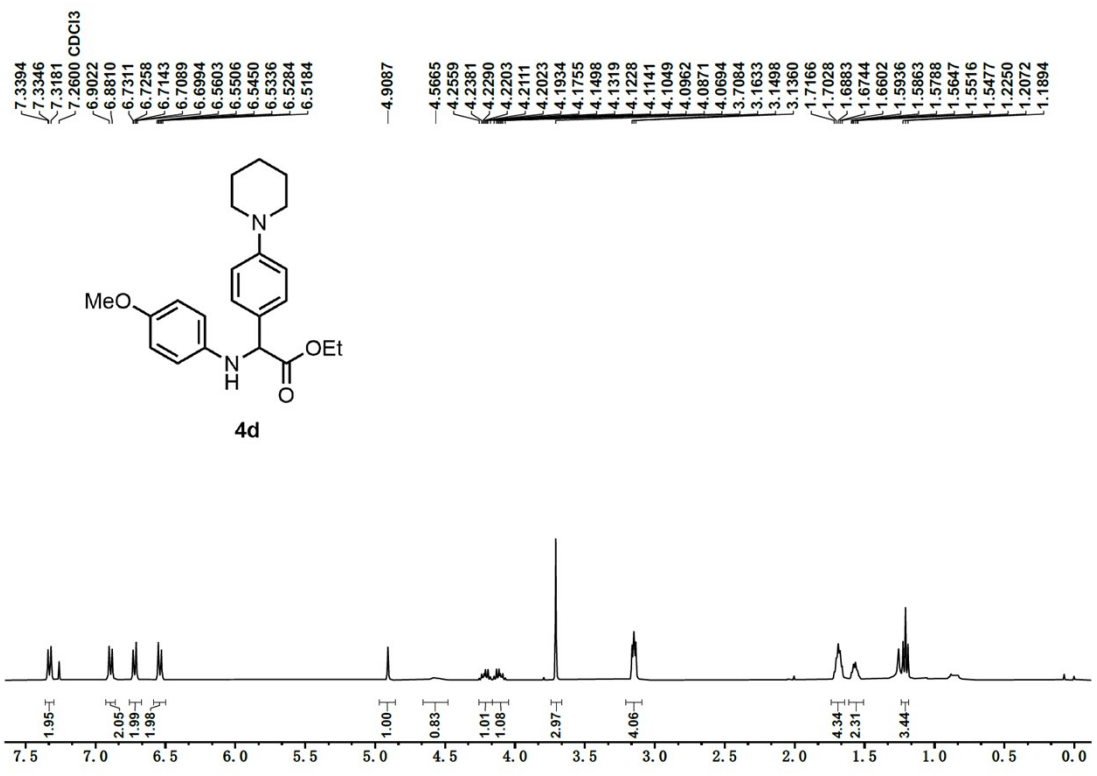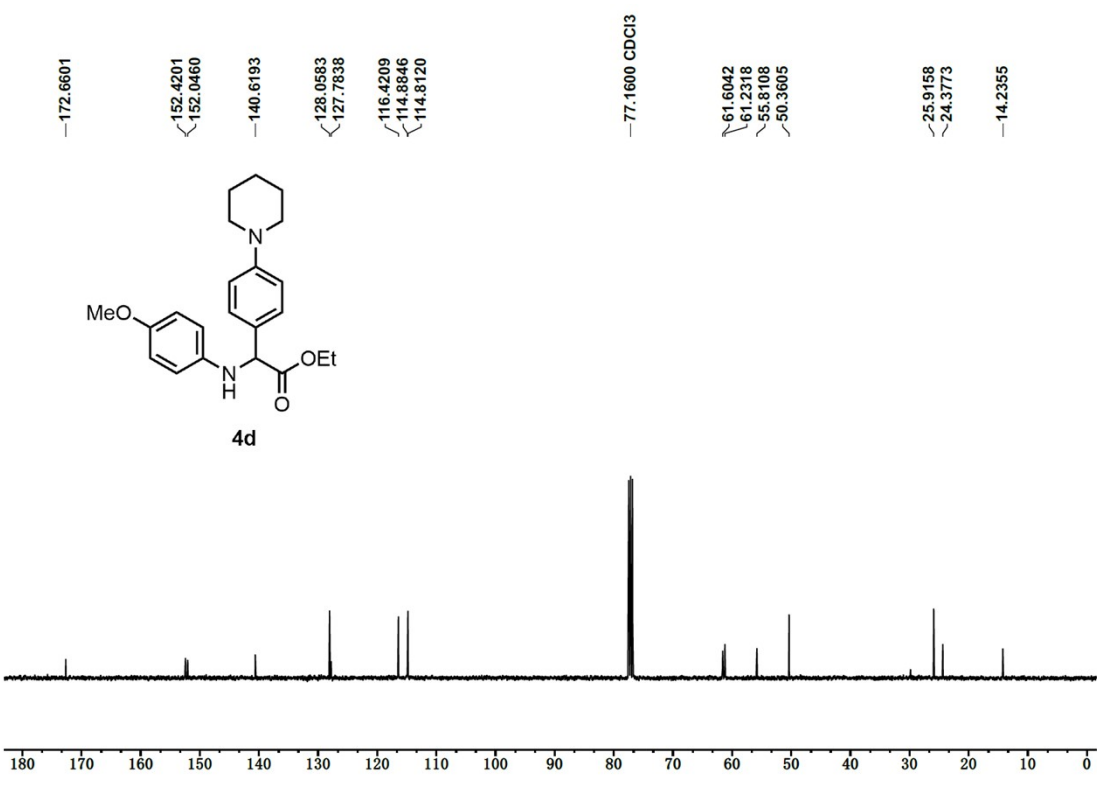

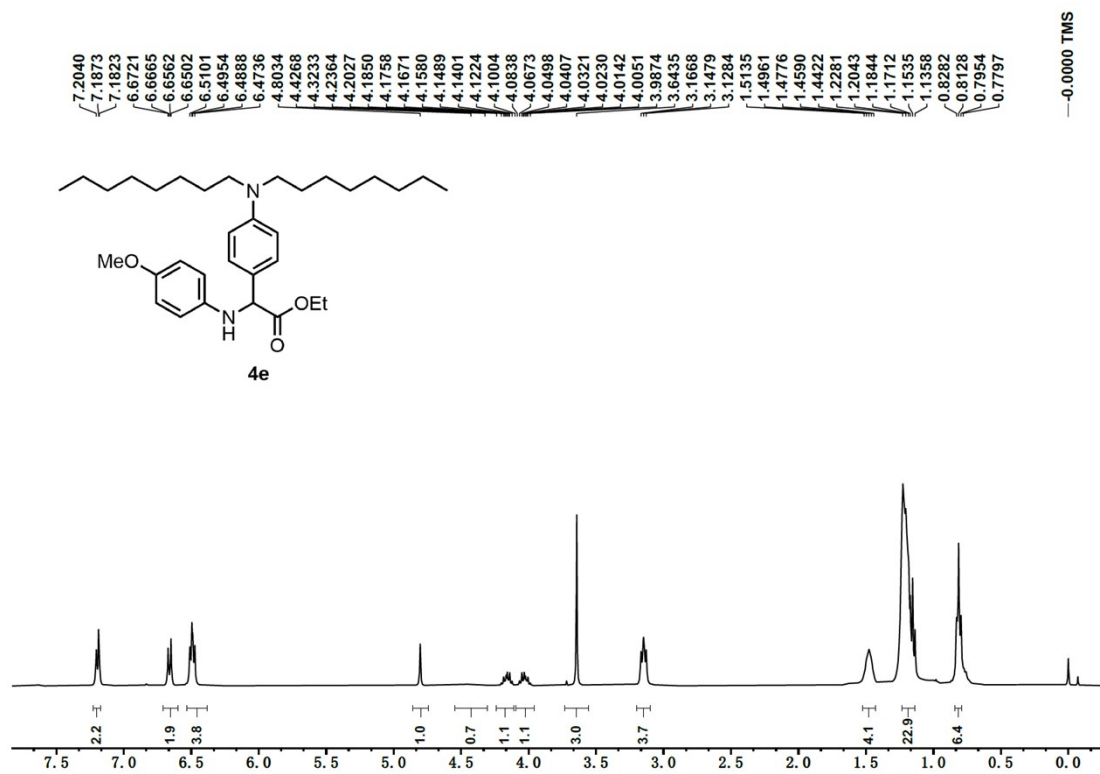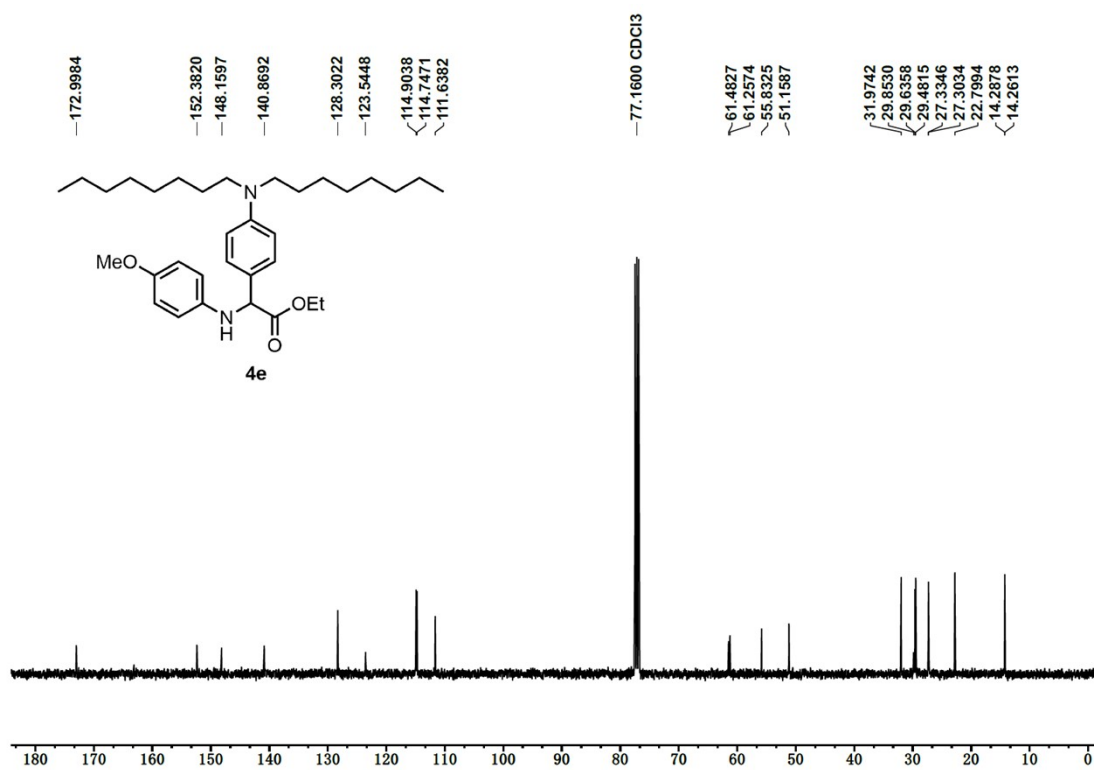

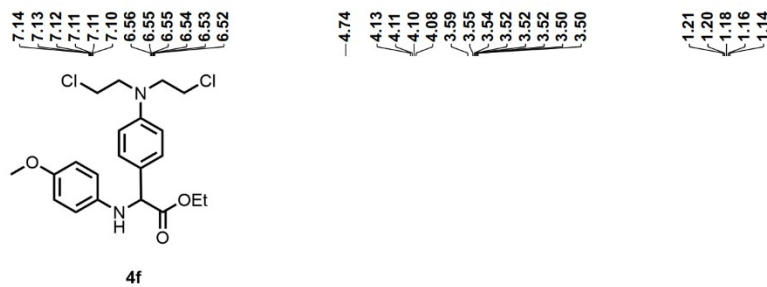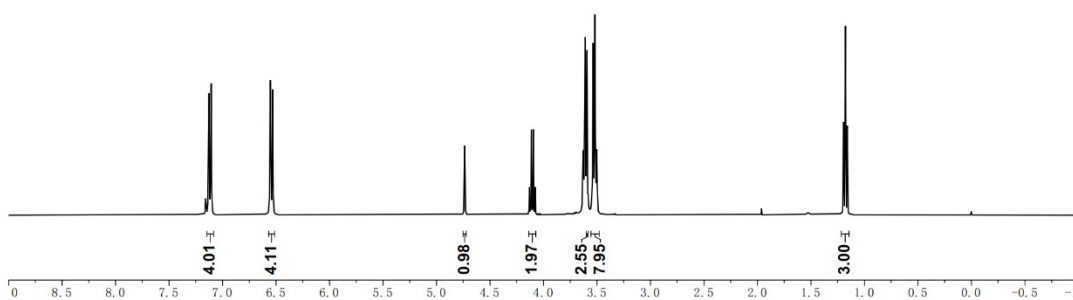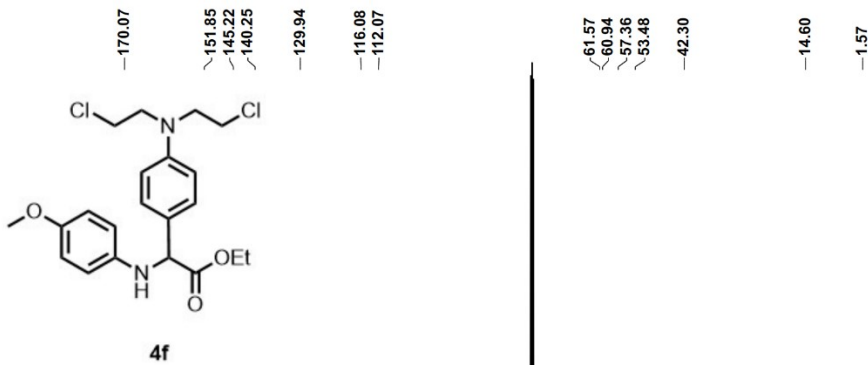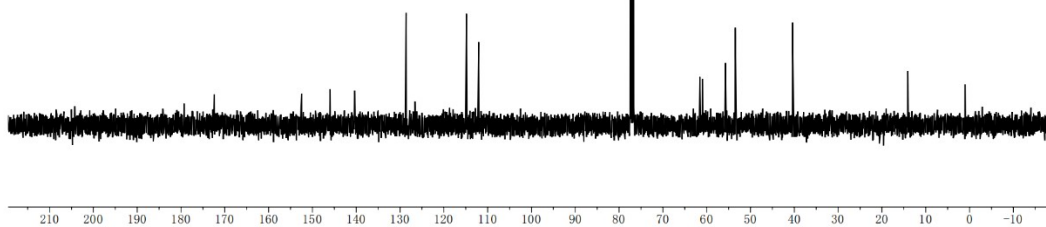



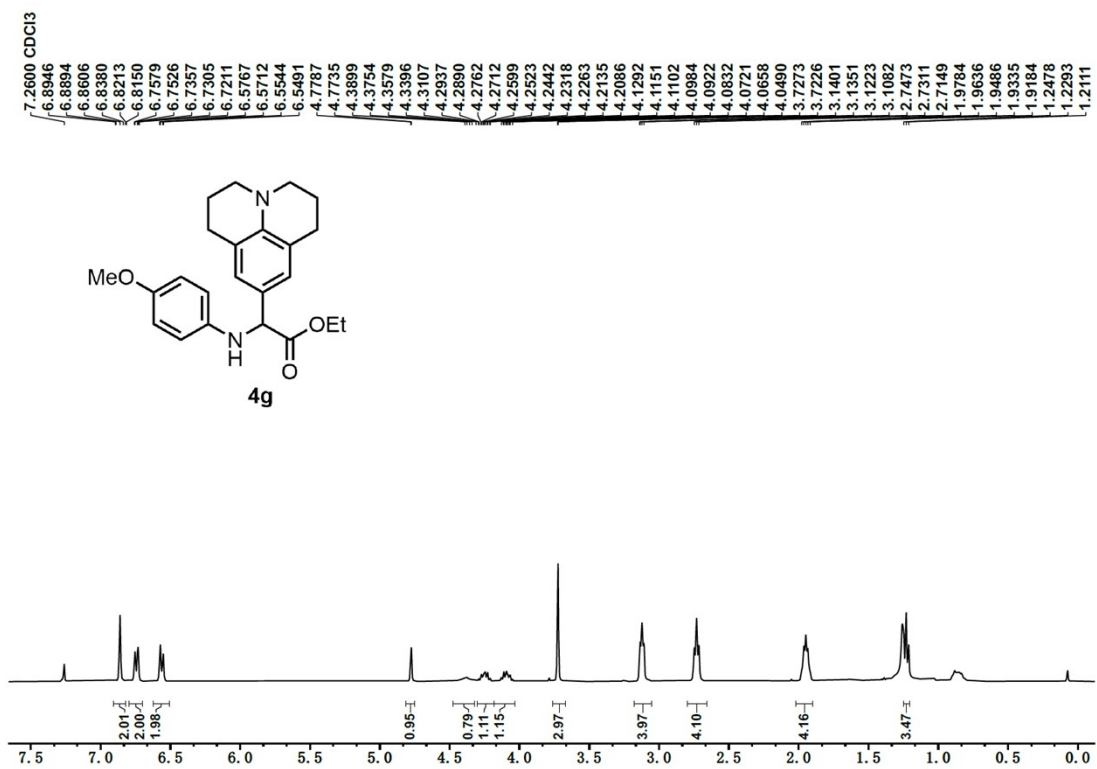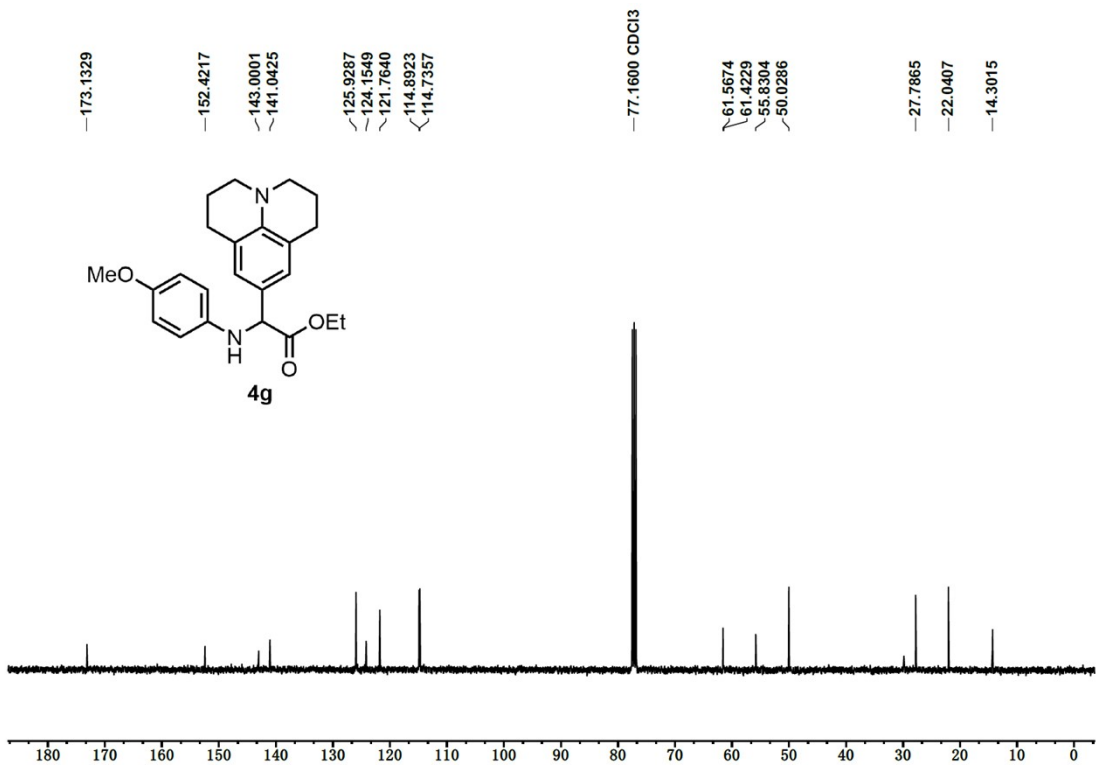

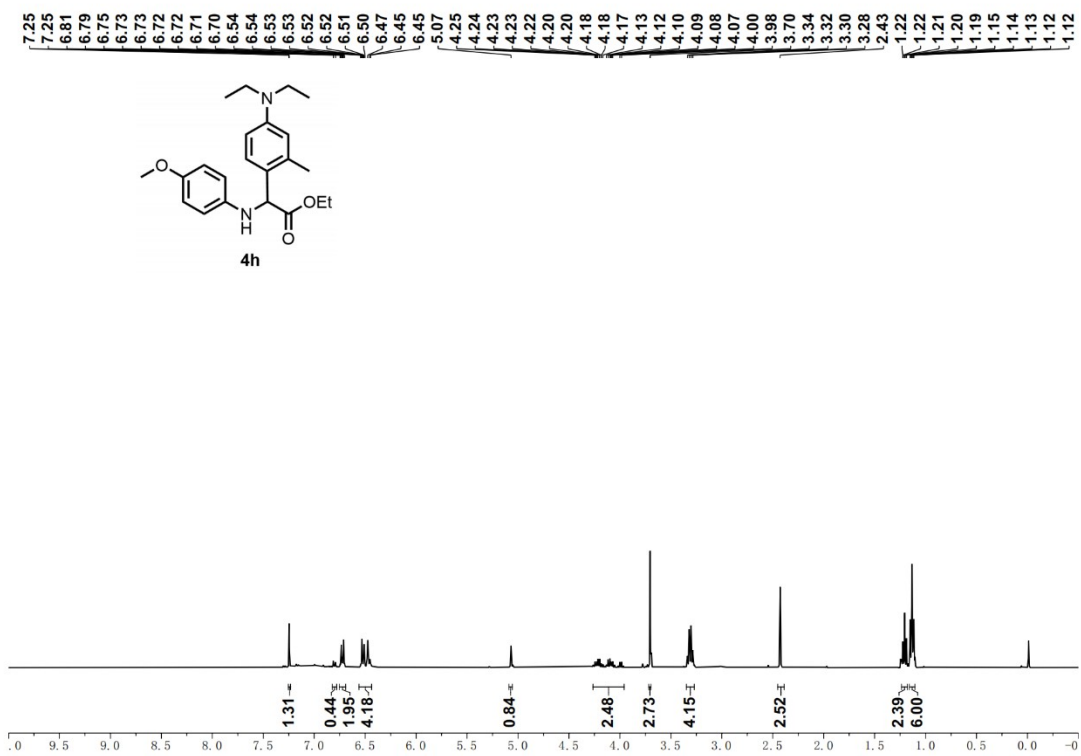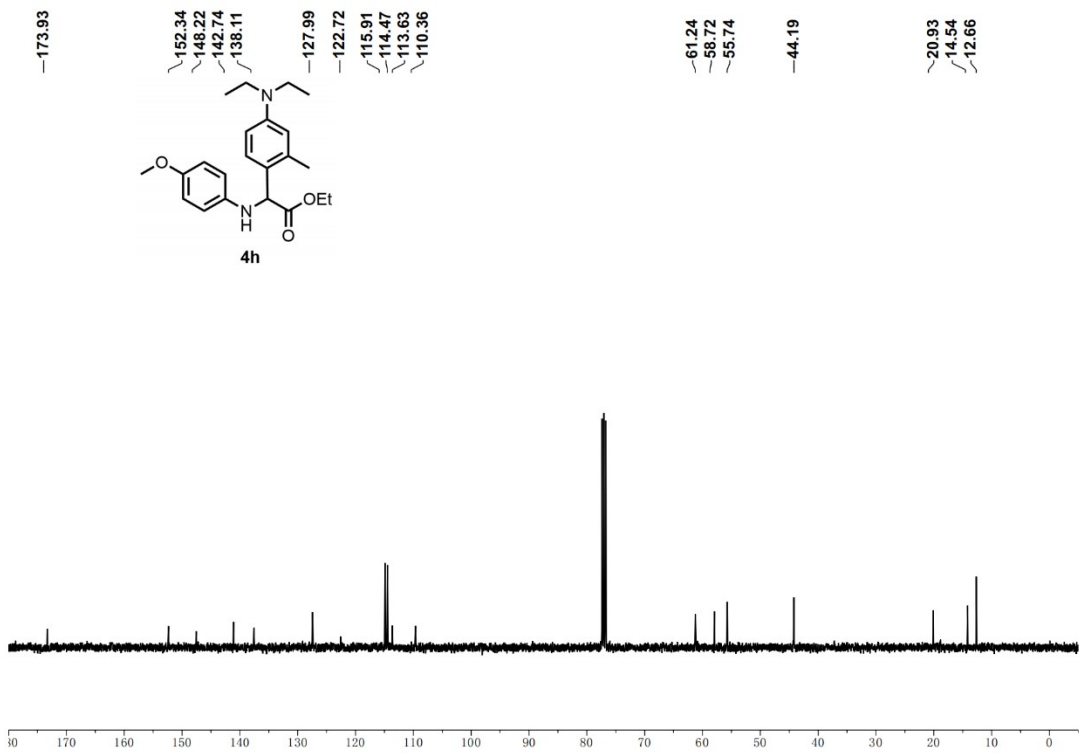

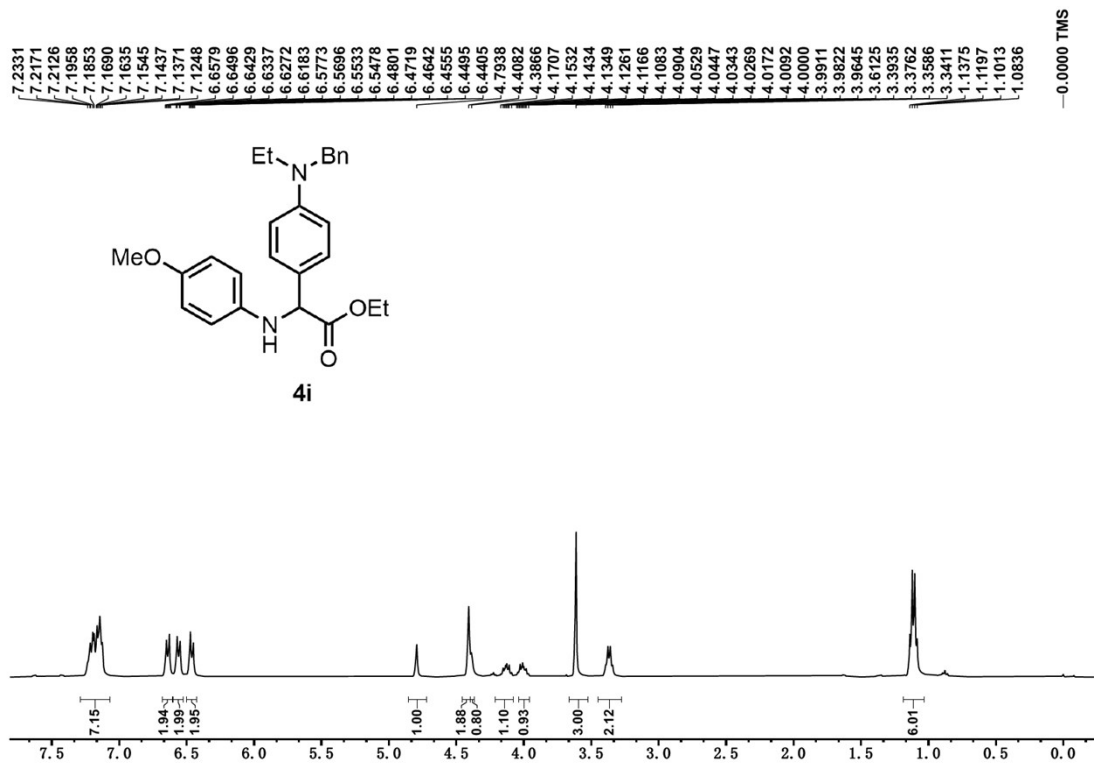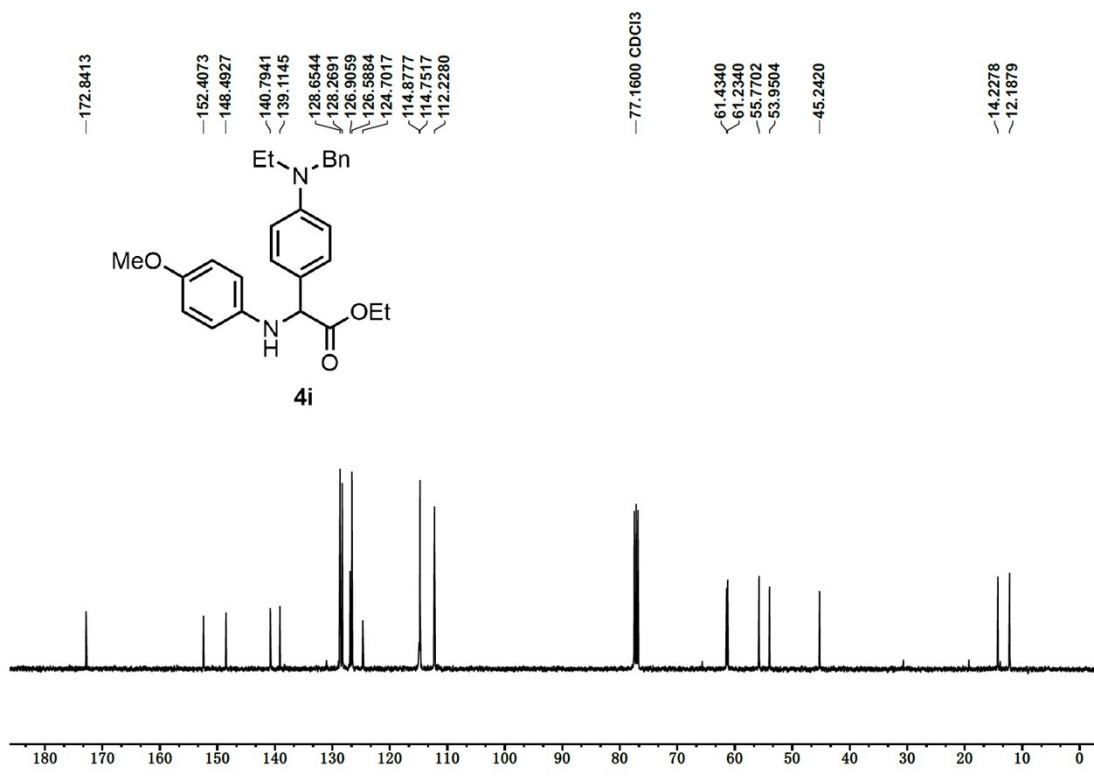

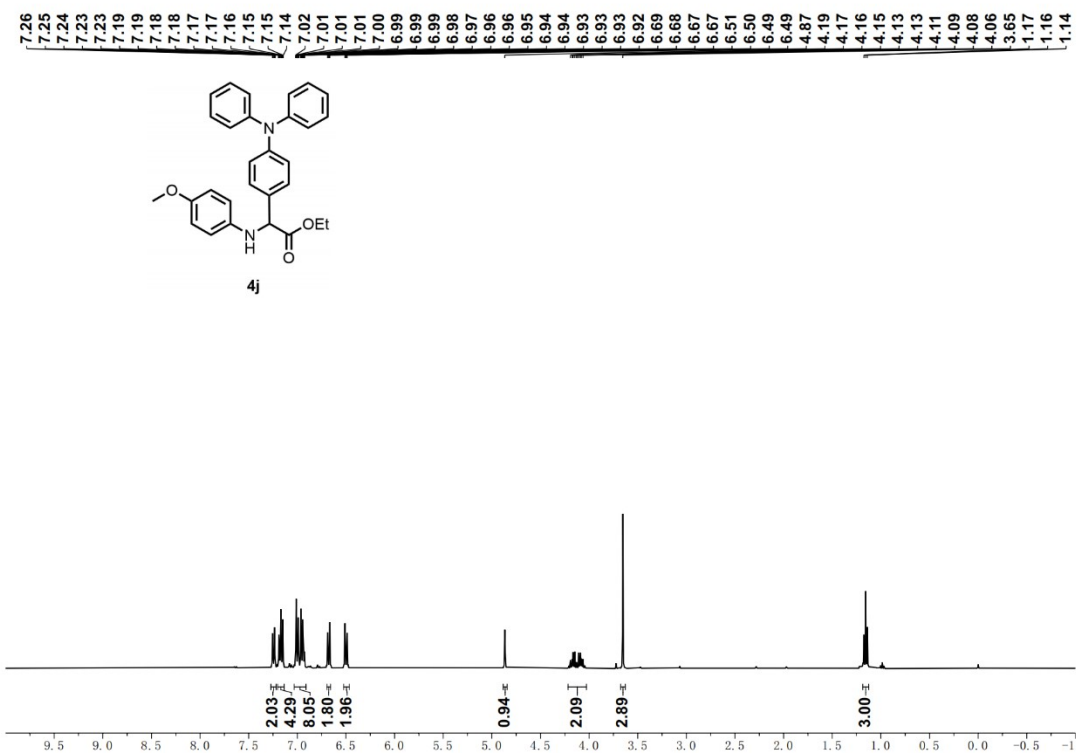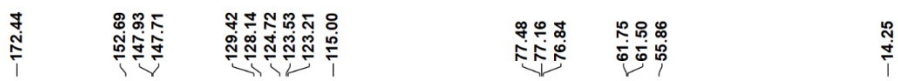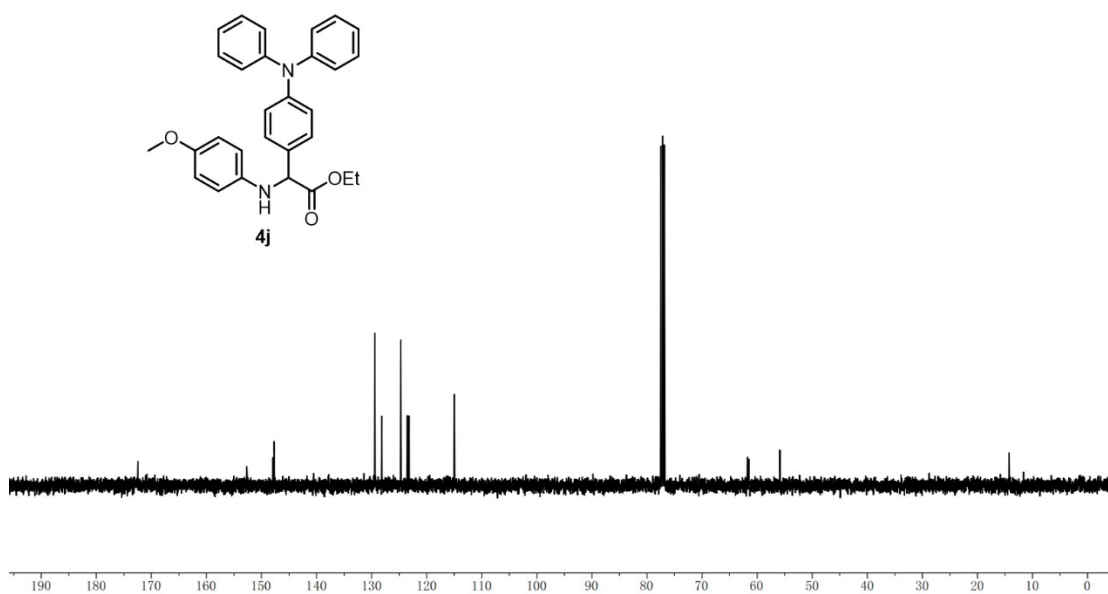

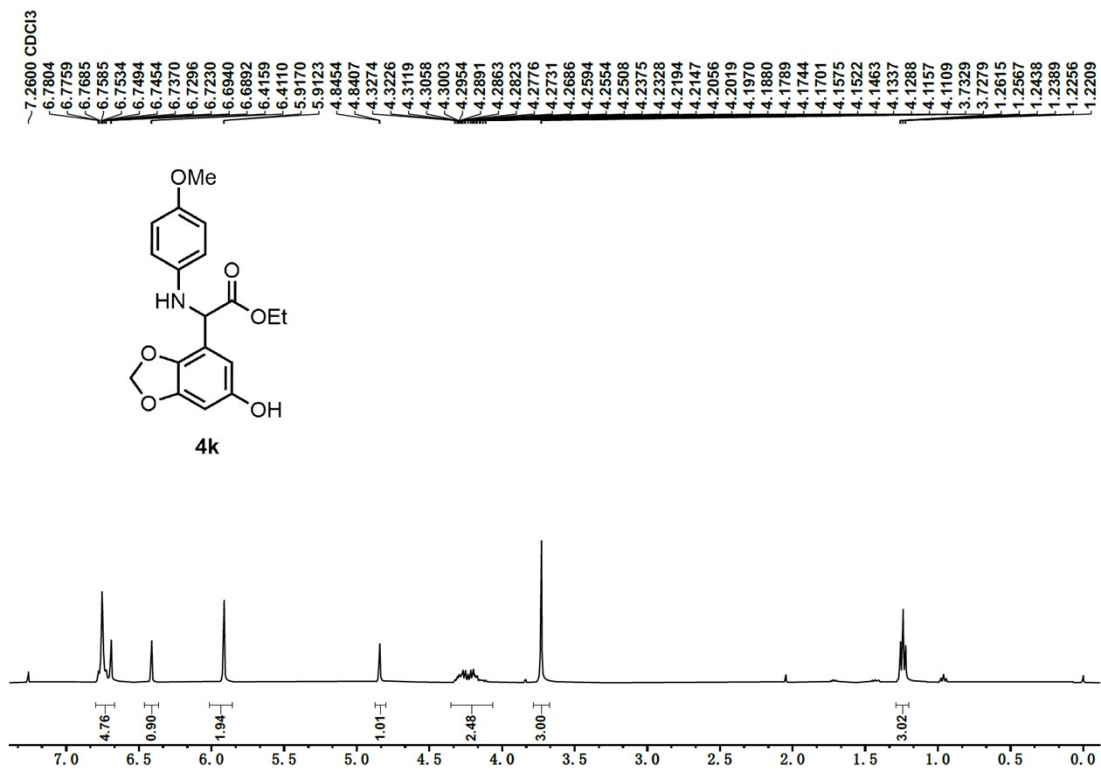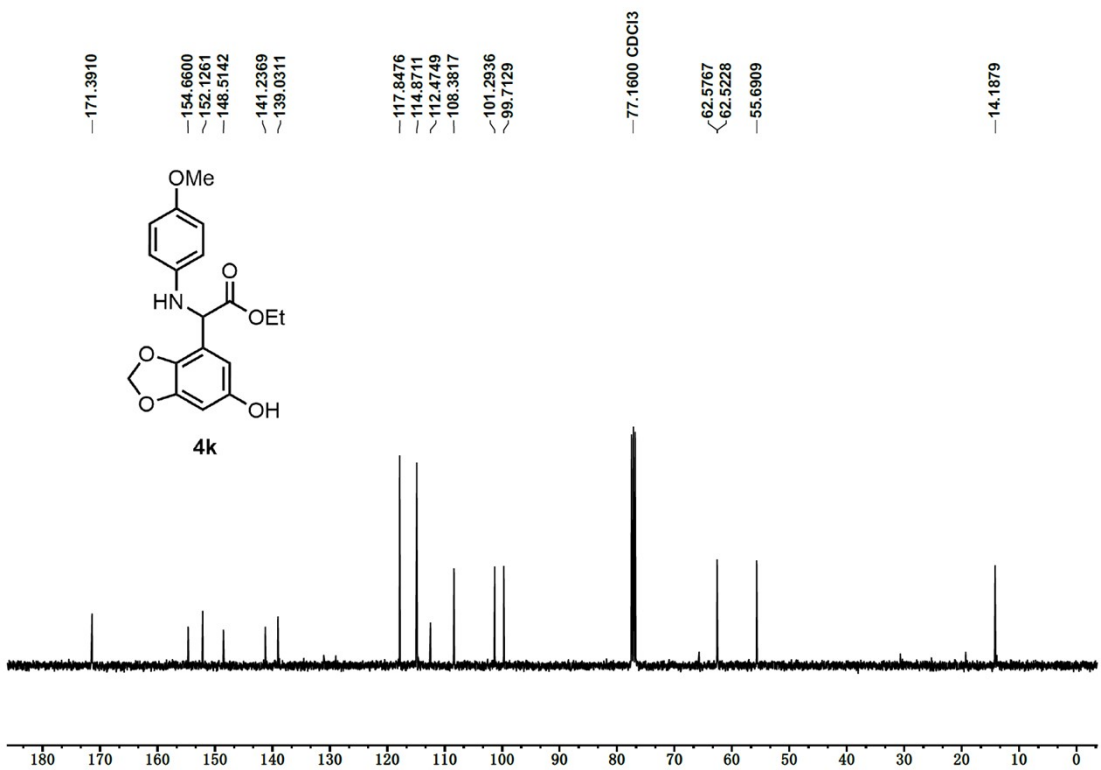

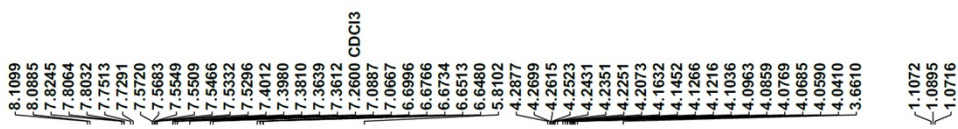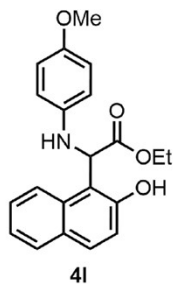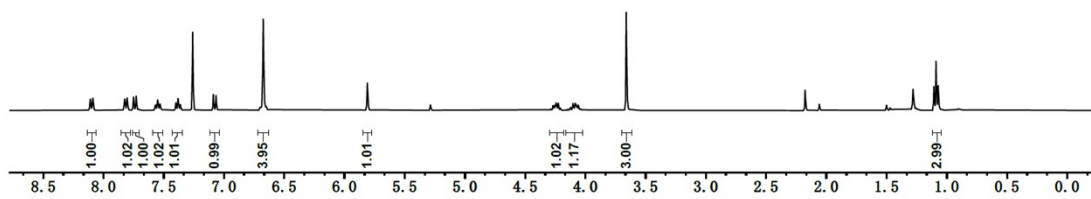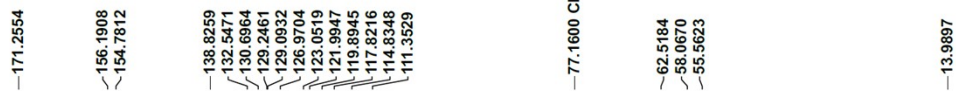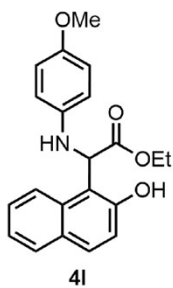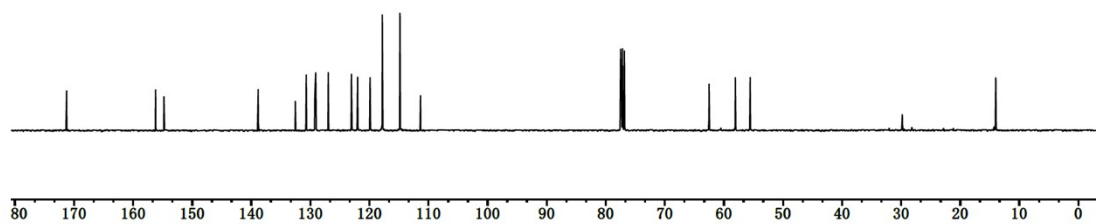

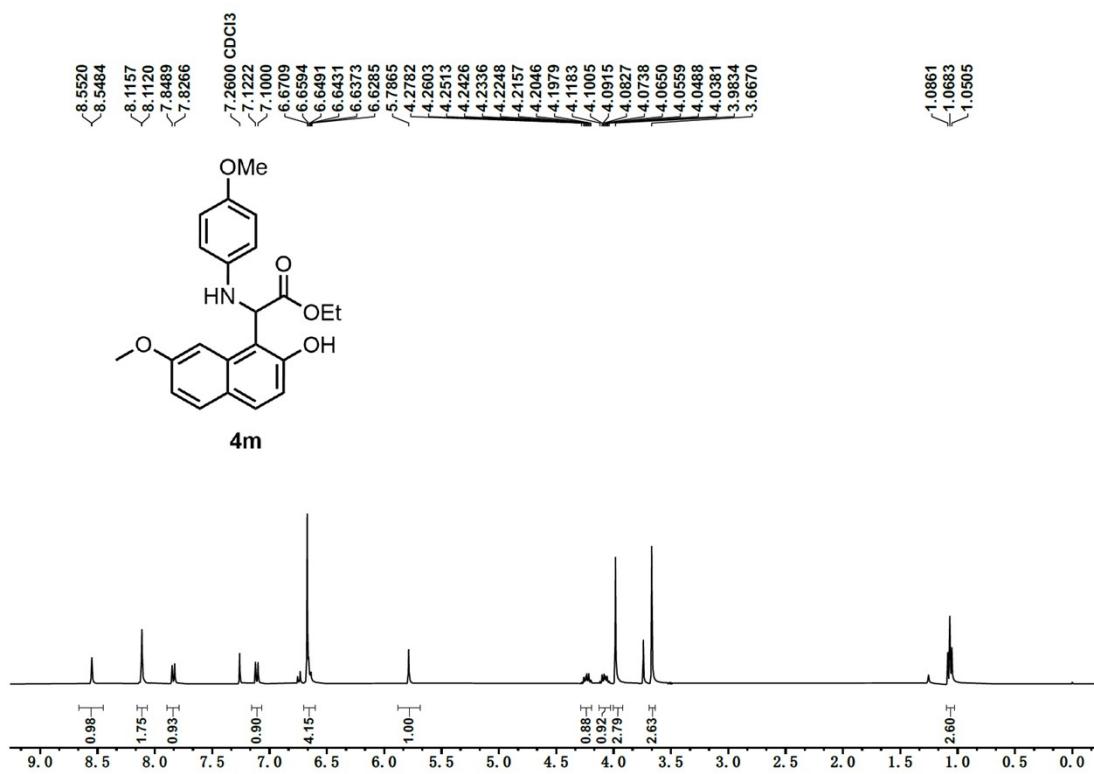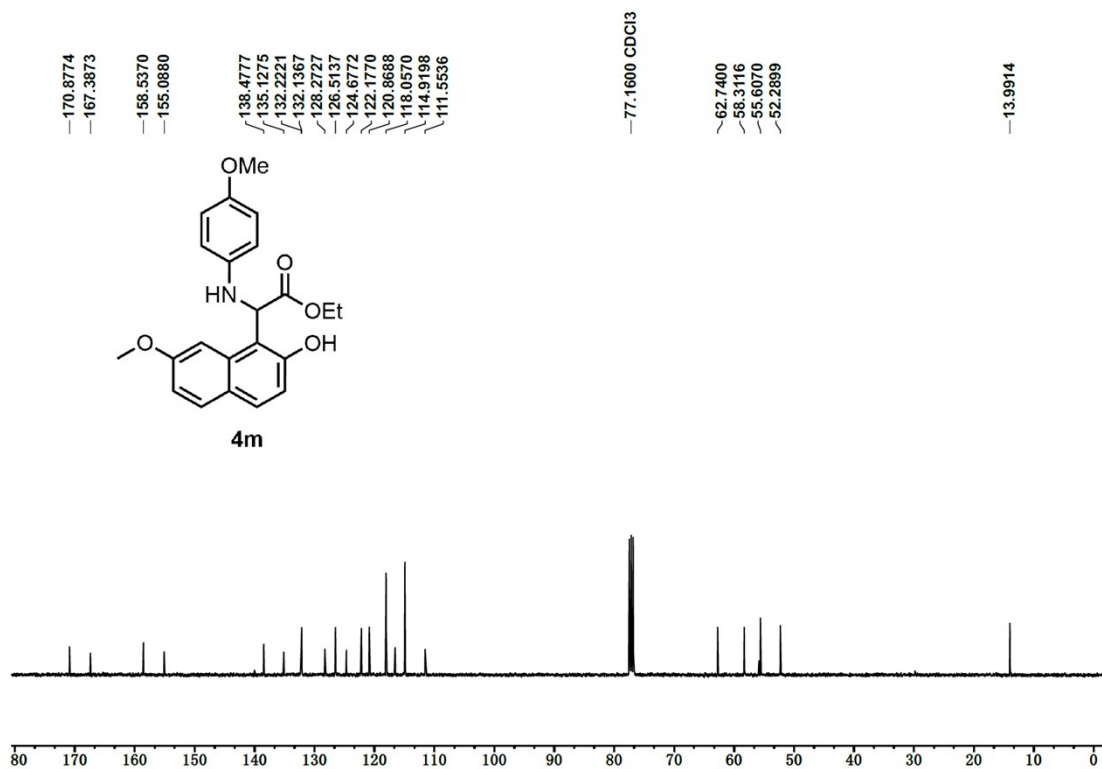

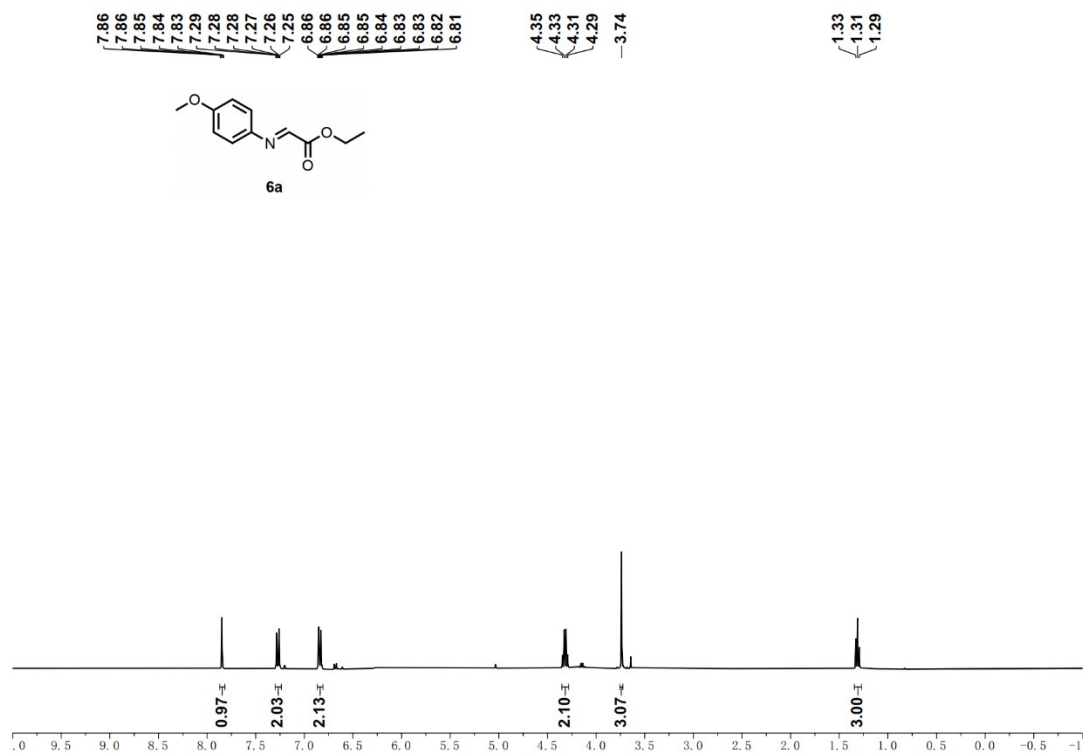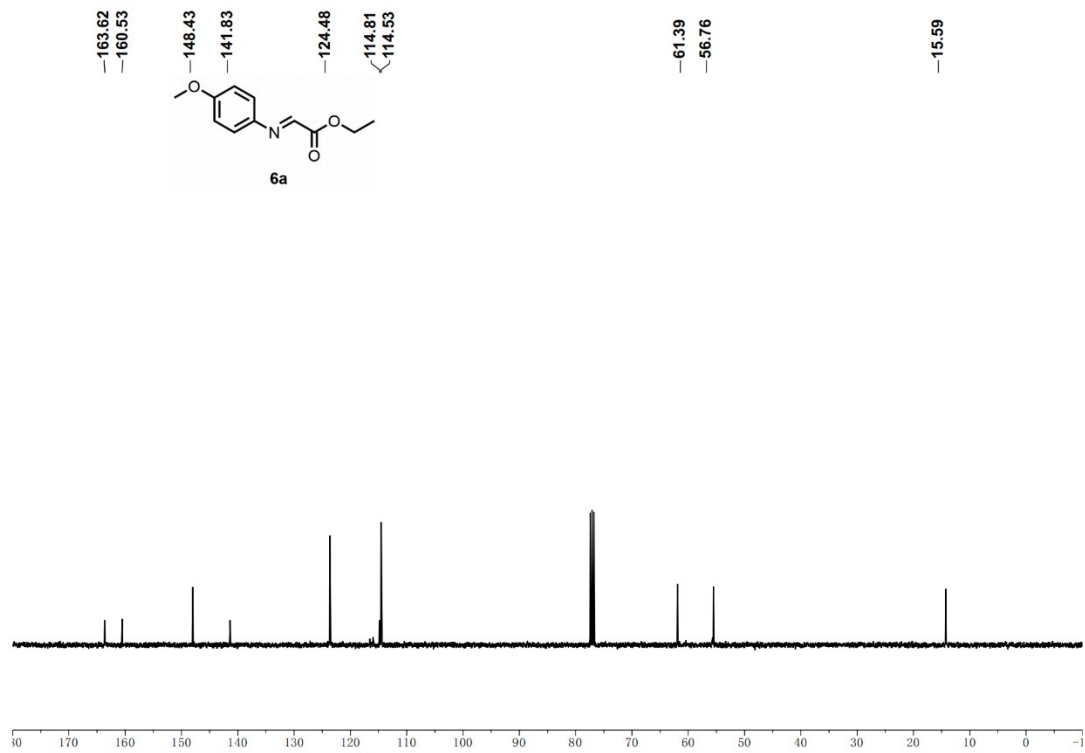

Supplement: d3ob01458d1.pdf [file d3ob01458d1.pdf]
